# Supplementary material for: Polyurea-magnetic hierarchical porous composites for profiling of anionic metabolites
Source: Royal Society of Chemistry journal article supplement (doi:10.1039/d3ay01718d), 2023-01-01
Supplement: d3ay01718d1.pdf [file d3ay01718d1.pdf]

## Supporting Information

### **Polyurea-Magnetic Hierarchical Porous Composites for Profiling of Anionic Metabolites**

# Contents

|                                                                                     |    |
|-------------------------------------------------------------------------------------|----|
| <b>1. Experiment Section</b> .....                                                  | 1  |
| <b>Materials</b> .....                                                              | 1  |
| <b>Preparation of Polyurea-Magnetic Hierarchical Porous Composites (PMCs)</b> ..... | 1  |
| <b>Characterization</b> .....                                                       | 1  |
| <b>Adsorption Experiments</b> .....                                                 | 2  |
| <b>Desorption Experiments</b> .....                                                 | 3  |
| <b>MS Analysis</b> .....                                                            | 3  |
| <b>Sample Preparation</b> .....                                                     | 3  |
| <b>Method Validation</b> .....                                                      | 4  |
| <b>Adsorption of anionic metabolites with PMC-HMDA</b> .....                        | 4  |
| <b>2. Supporting Figures and Tables</b> .....                                       | 6  |
| <b>References</b> .....                                                             | 56 |

# 1. Experiment Section

## Materials

LC-MS grade acetonitrile, formic acid, ammonium hydroxide solution (25.0% NH<sub>3</sub> basis), and water were purchased from Thermo Fisher Scientific (Waltham, MA, USA). 1,3-Diaminopropane, 1,4-Diaminobutane, 1,6-Hexamethylenediamine, m-Phenylenediamine, and N, N-Dimethylformamide were purchased from Aladdin Reagent Co. (Shanghai, China). N, N'-Carbonyldiimidazole was obtained from Macklin (Shanghai, China). The standards were purchased from Sigma-Aldrich (St. Louis, MO, USA) and Aladdin Reagent Co. (Shanghai, China). All agents were used without further purification.

## Preparation of Polyurea-Magnetic Hierarchical Porous Composites (PMCs)

The magnetic particles (MPs) of Fe<sub>3</sub>O<sub>4</sub> were prepared by hydrothermal method with minor modification. FeCl<sub>3</sub>·6H<sub>2</sub>O (0.729 g) was dissolved in 40 mL of ethylene glycol under magnetic stirring for 30 min. Then, sodium acetate trihydrate (1.920 g) were added into above solution under magnetic stirring for 60 min. The brown solution was transferred into an autoclave and heated to 200°C for 16 h. The product was magnetically separated and washed several times with ethanol and water. Fe<sub>3</sub>O<sub>4</sub> were coated by SiO<sub>2</sub> through the Stöber sol-gel method. Amino-magnetic particles (MPs-NH<sub>2</sub>) were prepared according to our previous study.<sup>1</sup>

Diamine (0.124 mmol) and N, N'-Carbonyldiimidazole (CDI, 0.248 mmol) were dissolved in 1 mL of N, N-Dimethylformamide (DMF) under shaking 1 h, MPs-NH<sub>2</sub> (10 mg, was dispersed in 1 mL of DMF) and diamine (0.124 mmol) were successively dispersed in the above mixture. After shaking for 3 h, the product was washed with DMF and water, finally dispersed in water under shaking more than 3 h.<sup>1</sup> The obtained MPs-Diamine was dispersed in 5 mL of 50% acetonitrile (ACN) for use.

## Characterization

The morphology and structure were characterized by Scanning electron microscopy (SEM, Hitachi-SU8010, Japan). The Fourier transform infrared spectra (FTIR) was recorded on a Magna-550 (Nicolet, USA) spectrometer. Spectra were scanned over the range of 400–4000 cm<sup>-1</sup>. The X-ray diffraction (XRD) was performed on a Rigaku SmartLab (Japan). Thermogravimetric analysis (TGA, TG/DTA7300, Hitachi, Japan) was carried out in nitrogen with a heating rate of 20°C min<sup>-1</sup>. The zeta potential data were recorded via DLS (Zetasizer Nano ZS90, UK). Biological samples were analyzed by a Fourier transform ion cyclotron resonance mass spectrometer

(FTICR MS, 7.0 T, Solarix XR, Bruker Daltonics, Billerica, USA). It was a high-precision mass spectrum equipped with electrospray ionization (ESI), the error was less than 1ppm, and the resolution was 160 000 at  $m/z$  400.

### Adsorption Experiments

To optimize the adsorption and desorption for various anionic metabolites in a biological sample, seven standards from different kinds of anionic metabolites were mixed to generate a standard mixture, including adenosine monophosphate (AMP), 3',5'-cyclic monophosphate (cAMP), 2'-deoxy-5'-adenosine monophosphate (dAMP), flavin adenine dinucleotide (FAD), nicotinamide adenine dinucleotide phosphate (NADP), malic acid (MA), and citric acid (CA), which was used to adsorb and desorb under different conditions. The desorbed samples were analyzed by MS, and the peak area of each MS/MS base peak of standard was used to evaluate the efficiencies of different conditions. We optimized the adsorption conditions including formic acid (FA) proportion, organic phase proportion for ACN, and temperature, as well as the desorption conditions including ammonium hydroxide proportion.

All the experiments were performed under optimized adsorption conditions. Briefly, 0.5 mg PMCs were incubated with 1.2 mL of AMP mixed 95% ACN aqueous solution at different concentrations (100  $\mu\text{M}$ , 130  $\mu\text{M}$ , 200  $\mu\text{M}$ ) under shaking 3 h. In the adsorbing stage, the samples were magnetically separated and 50  $\mu\text{L}$  of supernatant was sampled at specified intervals up to 3 h. The supernatant was diluted with 50% ACN aqueous solution (2%  $\text{NH}_4\text{OH}$ , (v/v)) and final AMP concentration were detected by MS and calculated by peak areas.

The amount of adsorption at equilibrium,  $q_e$  ( $\mu\text{mol g}^{-1}$ ), was calculated as

$$q_e = \frac{(C_0 - C_e)V}{M}$$

where  $c_0$  and  $c_e$  ( $\mu\text{mol L}^{-1}$ ) are the initial and equilibrium AMP concentrations in samples, respectively;  $V$  (L) is the volume of samples; and  $M$  (g) is the mass of the adsorbent used.<sup>2</sup>

The thermodynamic parameters are calculated mainly according to the following formulae:

$$\Delta G^0 = -RT \ln K$$

$$K = \frac{q_e}{c_e}$$

$$\ln K = \frac{\Delta S^0}{R} - \frac{\Delta H^0}{RT}$$

where  $R$  and  $K$  are the universal gas constant and thermodynamic equilibrium constant;  $T$  is the temperature of adsorption.<sup>2</sup>

The formula used to fit the pseudo-second-order kinetics model has been reported in the study:

$$\frac{t}{q_t} = \frac{1}{k \cdot q_e^2} + \frac{1}{q_e} \cdot t$$

where  $q_t$  is the amount of adsorption at time  $t$ , and  $k$  is the pseudo-second-order rate constant.<sup>2</sup>

### **Desorption Experiments**

After the equilibrium of the adsorbent site, the sediment was desorbed by 1.2 mL of 50% ACN aqueous solution (2‰ NH<sub>4</sub>OH, (v/v)) under optimized desorption conditions. Similarly, 50 μL of supernatant was diluted with 50% ACN aqueous solution, the AMP concentrations in them were analyzed by MS and calculated by peak areas.

The standard (AMP, 1 μmol·L<sup>-1</sup>) and 0.5 mg of PMC-HMDA were added to the 95% acetonitrile aqueous (containing 0.5% formic acid, v/v) followed by shaking at 303 K with 5 min. After wash and separation, PMC-HMDA were re-dispersed in 500 μL of 50% acetonitrile aqueous solution (containing 2‰ NH<sub>4</sub>OH, v/v). The supernatant was collected by magnetic separation and centrifuged at 15000 g for 20 min at 4 °C for MS detection. We Repeated the above steps five times to complete the recovery experiment.

### **MS Analysis**

Optimization of enrichment and separation methods were carried out using HPLC/ESI-MS/MS system consisting of an Agilent 1200 series capillary system (Agilent, Santa Clara, USA) and LTQ XLTM linear Ion Trap MS (Thermo Fisher Scientific, Waltham, MA, USA). Further qualitative identification was performed on an amide column (2.1 × 100 mm, 3.5 μm, BEH Amide). The column temperature was maintained at 25°C. Mobile phase A and B were 2‰ NH<sub>4</sub>OH aqueous solution and NH<sub>4</sub>OH/ACN solution (2‰). And the gradient was set as follows: 0 min, 95% B; 2 min, 90% B; 5 min, 80% B; 8 min, 80% B; 10 min, 75% B; 11 min, 60% B; 12 min, 60% B; 13 min, 95% B; 15 min, 95% B. The flow rate was 0.3 mL min<sup>-1</sup>.

The mass spectrometry detection was performed in the negative ESI mode. And

parameters were set as: spray voltage at 4 kV, sheath gas flow rate at 40 arb, capillary temperature at 300°C. The full MS scan was recorded over the m/z range of 100-1000 m/z.

### **Sample Preparation**

A total of 50 µL of the mixed serum was diluted with 450 µL cold methanol (containing 50 µL aqueous) to remove the proteins by centrifugation at 15000 g for 5 min at 4°C. The extraction was repeated three times and the supernatant was lyophilized under a CV300 vacuum centrifugal concentrator.

About 30 mg rat liver was placed in a 1.5 mL centrifuge tube and 100 µL aqueous was added. Homogenization was performed using a handheld homogenizer (TissueMaster™) for 2 min. Then, protein precipitation was performed by adding 400 µL methanol. The following steps are the same as above.

The 293T and HUVEC cell ( $1 \times 10^6$  cells per sample) were washed three times with phosphate buffered saline and harvested in an 80% aqueous methanol solution. The following steps are described above.

### **Method Validation**

A mixed stock solution of nine standards was prepared in 95% acetonitrile aqueous (containing 0.5% formic acid, v/v, the concentrations of each standard were 10 µM), including AMP, inosine monophosphate (IMP), guanosine monophosphate (GMP), cAMP, ribose 5-phosphate (R5P), NADP, cytidine diphosphate (CDP), MA, and CA. The mixed standard solution was subjected to a gradient dilution. In the section of method validation, the blank matrix was 95% acetonitrile aqueous (containing 0.5% formic acid, v/v) without standards. And the direct infusion ESI-FTICR MS was used to demonstrate the reliability of the method. The mixed standard solution was subjected to a gradient dilution. Methodological data acquisition was performed by direct injection mass spectrometry (DIMS), the injection volume was 1 µL, and the flow rate was 8 µL min<sup>-1</sup>. The peak area of each MS/MS base peak of standard was ordinate values, and the concentration was abscissa values. The calibration curve was plotted, and the equation of calibration curve and coefficient of determination ( $R^2$ ) were obtained. The concentration at a signal-to-noise ratio of 3 was the limit of detection (LOD) of the method. Standard solutions were profiled at three times of the day and on three consecutive days to obtain precision. Three concentrations of mixed standard solutions of high (1.2 µM), middle (1.0 µM), and low (0.8 µM) were prepared (AMP, IMP, GMP, cAMP, R5P, NADP, CDP, MA, and CA). The

concentration of the compound was obtained by calibration curve, and the ratio of the calculated concentration to the actual concentration was the recovery.

#### **Adsorption of anionic metabolites with PMC-HMDA**

The PMC-HMDA 0.5 mg were dispersed in 200  $\mu$ L of 95% acetonitrile aqueous (containing 0.5% formic acid, v/v) and transferred to the pretreated biological samples, and then shaken for 5 min at 303 K. After adsorption, the PMC-HMDA trapped anionic metabolites were collected and isolated from the mixture using a magnet and respectively washed twice each with 80% and 50% acetonitrile aqueous solutions. After that, the PMC-HMDA were eluted with 500  $\mu$ L of 50% acetonitrile aqueous solution (containing 2%  $\text{NH}_4\text{OH}$ , v/v). The supernatant was collected by magnetic separation and centrifuged at 15000 g for 20 min at 4  $^{\circ}$ C for MS detection.

## 2. Supporting Figures and Tables

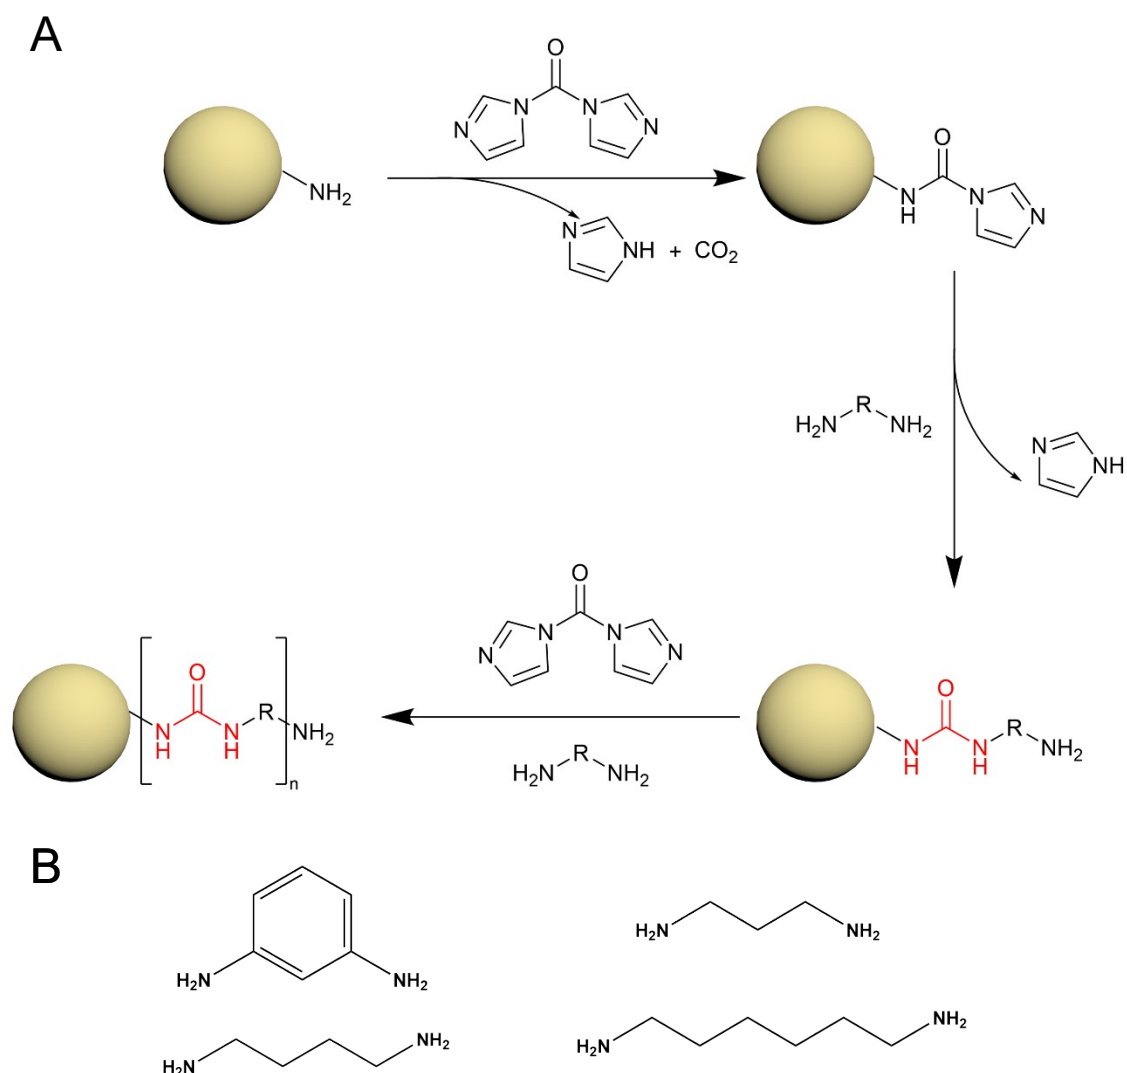

**Figure S1.** Conversion of diamine with  $N,N'$ -carbonyldiimidazole (A). Four kinds of monomers (B).



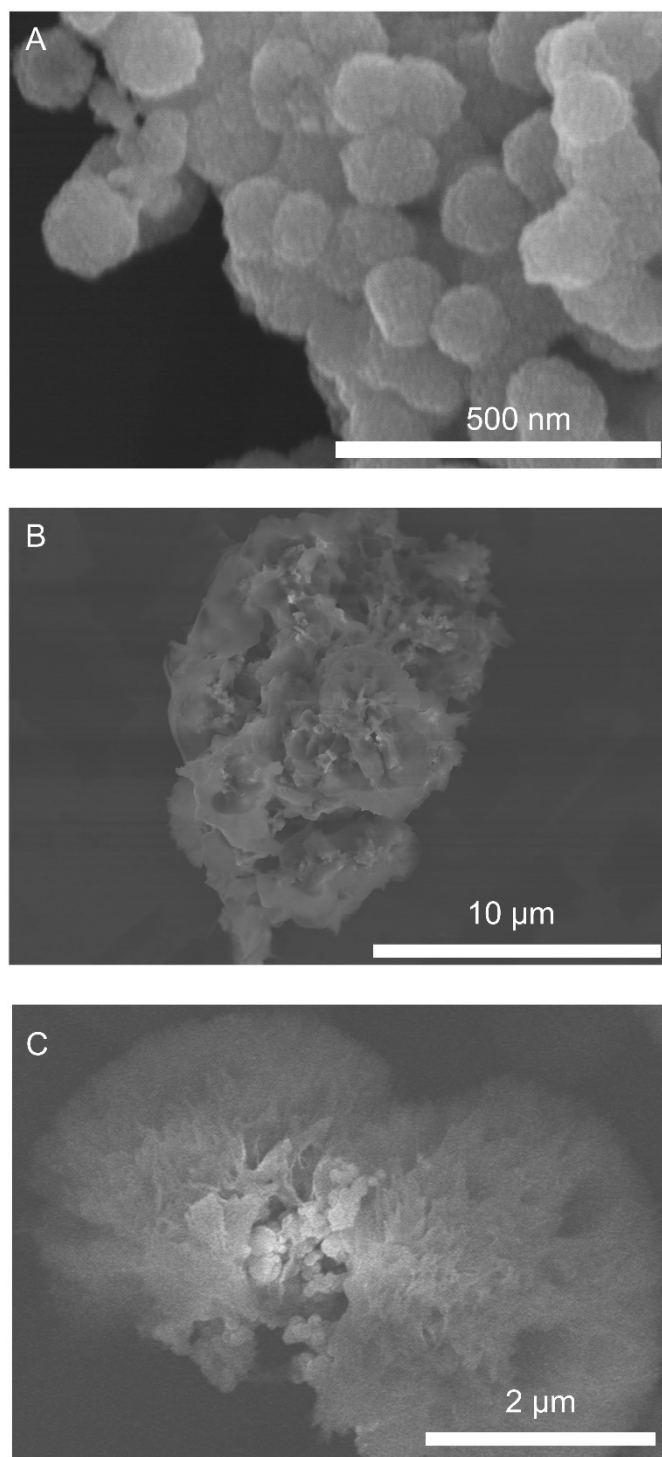

**Figure S2.** SEM of PMC-MPDA (A), PMC-DAP (B), and PMC-DAB (C).

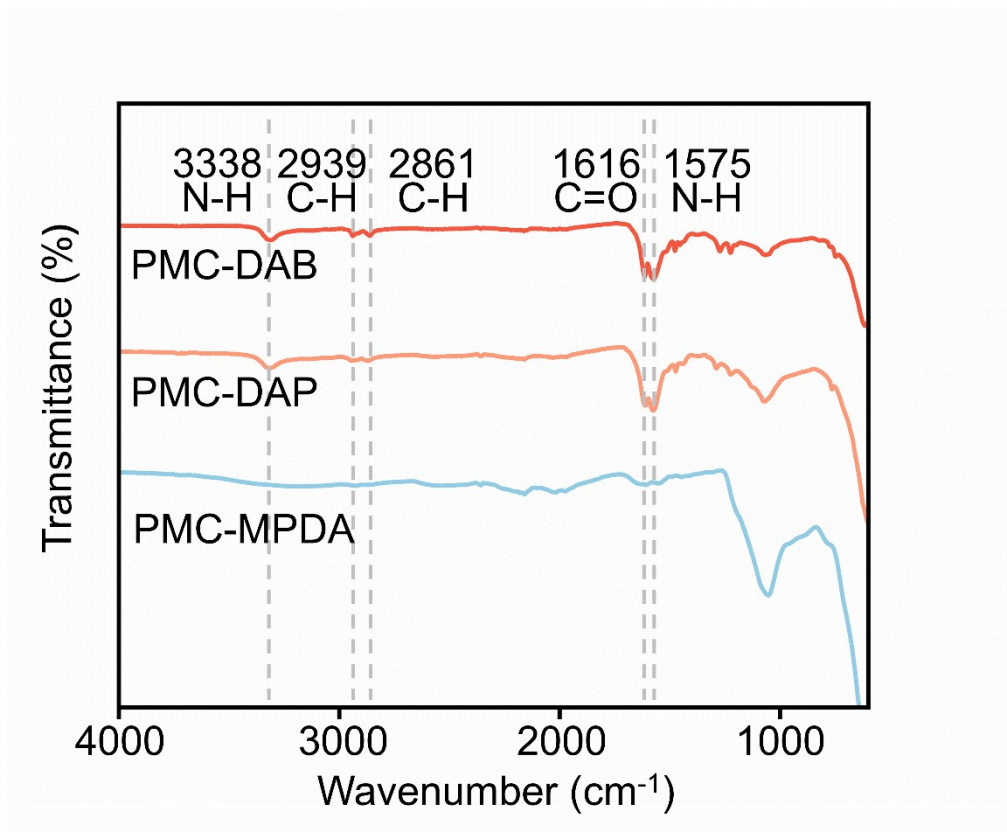

**Figure S3.** FTIR spectra of PMCs.

**Table S1.** Structural assignments for the peaks observed in the MALDI-TOF mass spectrum of polyurea synthesized with 1,6-Hexamethylenediamine and CDI.

| Examples                                                 | Series | m/z             | Proposed oligomer structure                   |
|----------------------------------------------------------|--------|-----------------|-----------------------------------------------|
| <p>● 1111 (n=7)</p> <p>1253 (n=8)</p> <p>1395 (n=9)</p>  | 1      | $n*142+1+115+1$ | $H-[ ]_n-NHCH_2CH_2CH_2CH_2CH_2CH_2NH_2 +H^+$ |
| <p>▲ 1137 (n=8)</p> <p>1279 (n=9)</p> <p>1421 (n=10)</p> | 2      | $n*142+1$       | Macrocyclic $+H^+$                            |
| <p>◆ 1163 (n=8)</p> <p>1305 (n=9)</p> <p>1447 (n=10)</p> | 3      | $n*142+1+25+1$  | $H-[ ]_n-C\equiv CH +H^+$                     |
| <p>◆ 1180 (n=8)</p> <p>1322 (n=9)</p> <p>1464 (n=10)</p> | 4      | $n*142+1+43$    | $H-[ ]_n-NHC\equiv O^+$                       |

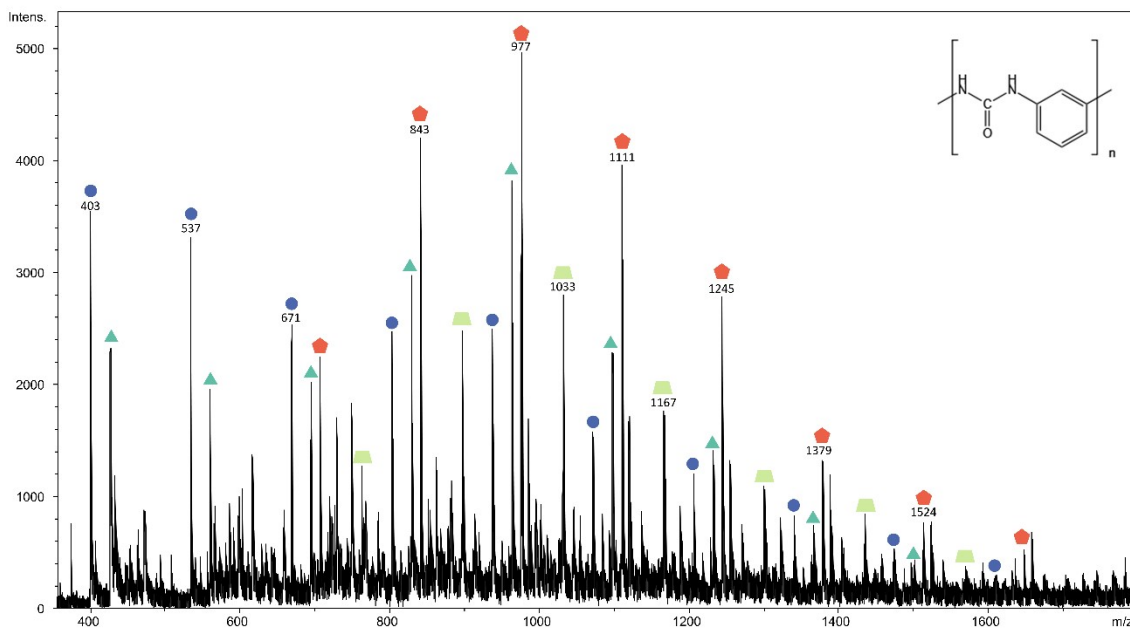

**Figure S4.** MALDI-TOF mass spectrum of polyurea synthesized with m-Phenylenediamine and CDI.

**Table S2.** Structural assignments for the peaks observed in the MALDI-TOF mass spectrum of polyurea synthesized with m-Phenylenediamine and CDI.

| Examples                                      | Series | m/z                | Proposed oligomer structure                                                                                         |
|-----------------------------------------------|--------|--------------------|---------------------------------------------------------------------------------------------------------------------|
| ● 939 (n=7)<br>● 1073 (n=8)<br>● 1207 (n=9)   | 1      | $n*134+1$          | Macrocyclic +H <sup>+</sup>                                                                                         |
| ▲ 965 (n=8)<br>▲ 1099 (n=9)<br>▲ 1233 (n=10)  | 2      | $n*134+15+15-18+1$ | CH <sub>3</sub> -[ ] <sub>n</sub> -CH <sub>3</sub> +H <sup>+</sup>                                                  |
| ◆ 1163 (n=8)<br>◆ 1305 (n=9)<br>◆ 1447 (n=10) | 3      | $n*134+1+71+23$    | H-[ ] <sub>n</sub> -CH <sub>2</sub> CH <sub>2</sub> CH <sub>2</sub> CH <sub>2</sub> CH <sub>3</sub> +H <sup>+</sup> |
| ◆ 1180 (n=8)<br>◆ 1322 (n=9)<br>◆ 1464 (n=10) | 4      | $n*134+1+15+23$    | H-[ ] <sub>n</sub> -CH <sub>3</sub> +Na <sup>+</sup>                                                                |

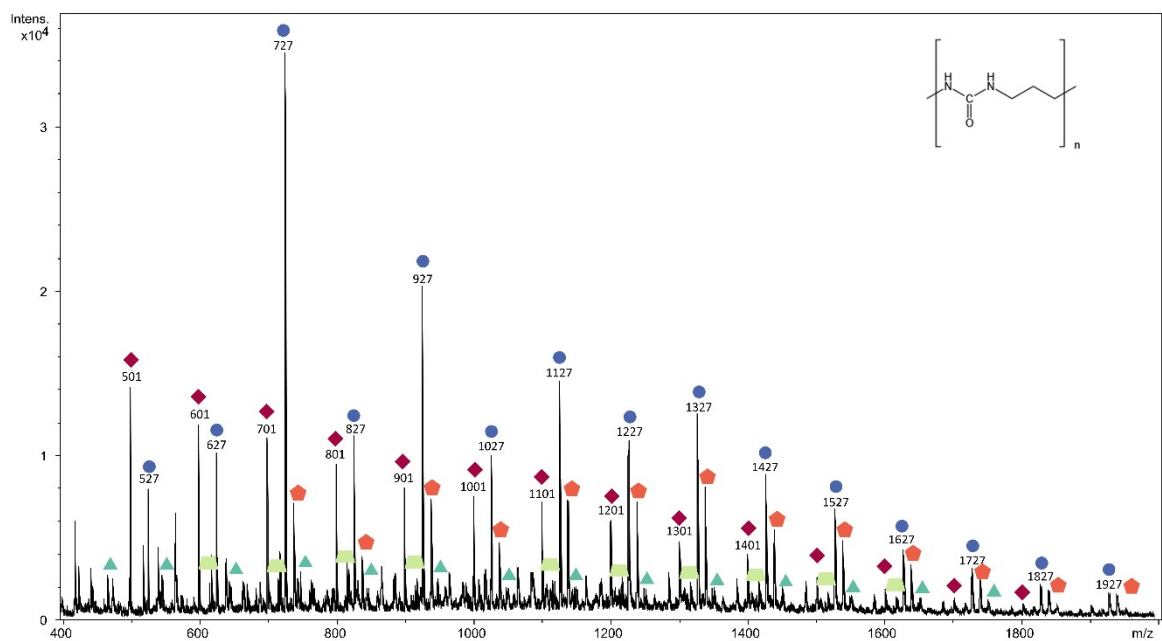

**Figure S5.** MALDI-TOF mass spectrum of polyurea synthesized with 1,3-Diaminopropane and CDI.

**Table S3.** Structural assignments for the peaks observed in the MALDI-TOF mass spectrum of polyurea synthesized with 1,3-Diaminopropane and CDI.

| Examples                                                                                                | Series | m/z                              | Proposed oligomer structure                                |
|---------------------------------------------------------------------------------------------------------|--------|----------------------------------|------------------------------------------------------------|
| <ul style="list-style-type: none"> <li>● 627 (n=6)</li> <li>● 727 (n=7)</li> <li>● 827 (n=8)</li> </ul> | 1      | $n \cdot 100 + 1 + 42 - 17 + 1$  | $\text{H}-[\ ]_n\text{-NHCH=CH}_2\text{-NH}_3\text{+H}^+$  |
| <ul style="list-style-type: none"> <li>▲ 649 (n=6)</li> <li>▲ 749 (n=7)</li> <li>▲ 849 (n=8)</li> </ul> | 2      | $n \cdot 100 + 1 + 42 - 17 + 23$ | $\text{H}-[\ ]_n\text{-NHCH=CH}_2\text{-NH}_3\text{+Na}^+$ |
| <ul style="list-style-type: none"> <li>▭ 717 (n=7)</li> <li>▭ 817 (n=8)</li> <li>▭ 917 (n=9)</li> </ul> | 3      | $n \cdot 100 + 15 + 1 + 1$       | $\text{H}-[\ ]_n\text{-CH}_3\text{+H}^+$                   |
| <ul style="list-style-type: none"> <li>◆ 739 (n=7)</li> <li>◆ 839 (n=8)</li> <li>◆ 939 (n=9)</li> </ul> | 4      | $n \cdot 100 + 15 + 1 + 23$      | $\text{H}-[\ ]_n\text{-CH}_3\text{+Na}^+$                  |
| <ul style="list-style-type: none"> <li>◆ 601 (n=6)</li> <li>◆ 701 (n=7)</li> <li>◆ 801 (n=8)</li> </ul> | 5      | $n \cdot 100 + 1$                | Macrocyclic +H <sup>+</sup>                                |

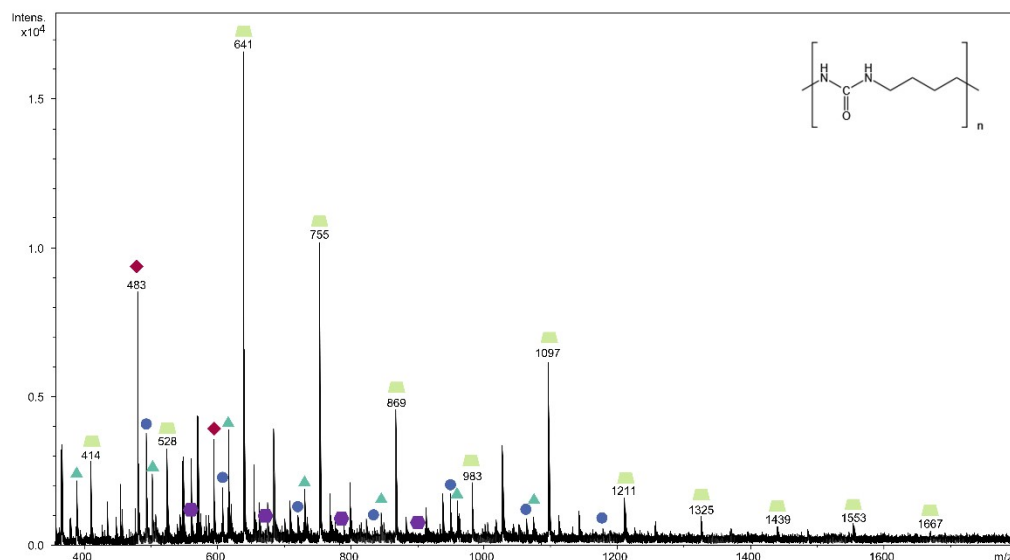

**Figure S6.** MALDI-TOF mass spectrum of polyurea synthesized with 1,4-Diaminobutane and CDI

**Table S4.** Structural assignments for the peaks observed in the MALDI-TOF mass spectrum of polyurea synthesized with 1,4-Diaminobutane and CDI.

| Examples                                 | Series | m/z                              | Proposed oligomer structure                                                           |
|------------------------------------------|--------|----------------------------------|---------------------------------------------------------------------------------------|
| ●<br>611 (n=5)<br>725 (n=6)<br>839 (n=7) | 1      | $n \cdot 114 + 1 + 17 + 23$      | $\text{H}-[ ]_n-\text{NH}_3 + \text{Na}^+$                                            |
| ▲<br>619 (n=5)<br>733 (n=6)<br>847 (n=7) | 2      | $n \cdot 114 + 1 + 43 - 18 + 23$ | $\text{H}-[ ]_n-\text{CH}_2\text{CH}_2\text{CH}_3 - \text{H}_2\text{O} + \text{Na}^+$ |
| ▤<br>641 (n=5)<br>755 (n=6)<br>869 (n=7) | 3      | $n \cdot 114 + 1 + 70$           | $\text{H}-[ ]_n-\text{CH}_2\text{CH}_2\text{CH}_2\text{C}\equiv\text{O}^+$            |
| ◆<br>711 (n=6)<br>825 (n=7)<br>939 (n=8) | 5      | $n \cdot 114 + 1 + 25 + 1$       | $\text{H}-[ ]_n-\text{C}\equiv\text{CH} + \text{H}^+$                                 |
| ⬡<br>685 (n=6)<br>799 (n=7)<br>913 (n=8) | 6      | $n \cdot 114 + 1$                | Macrocyclic $+\text{H}^+$                                                             |

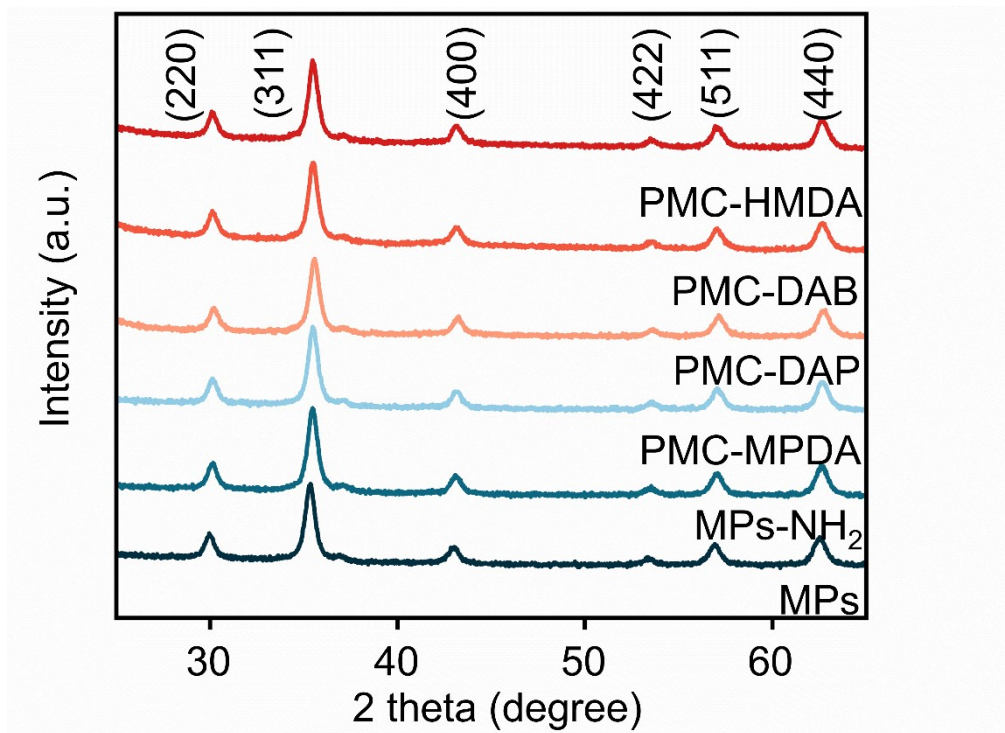

Figure S7. XRD patterns of MPs and PMCs

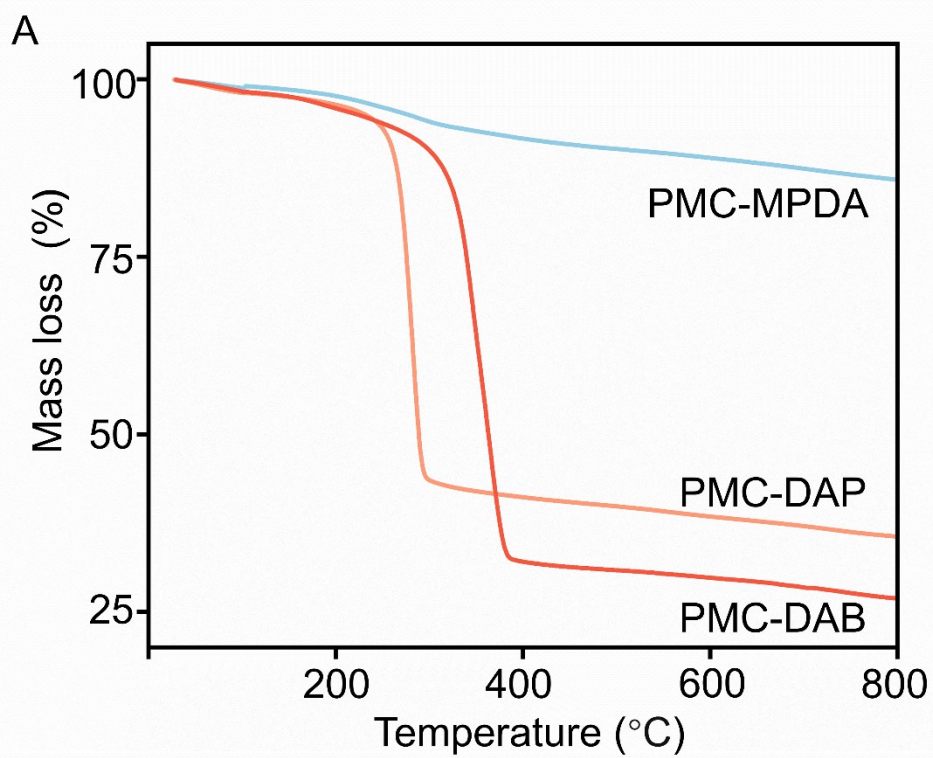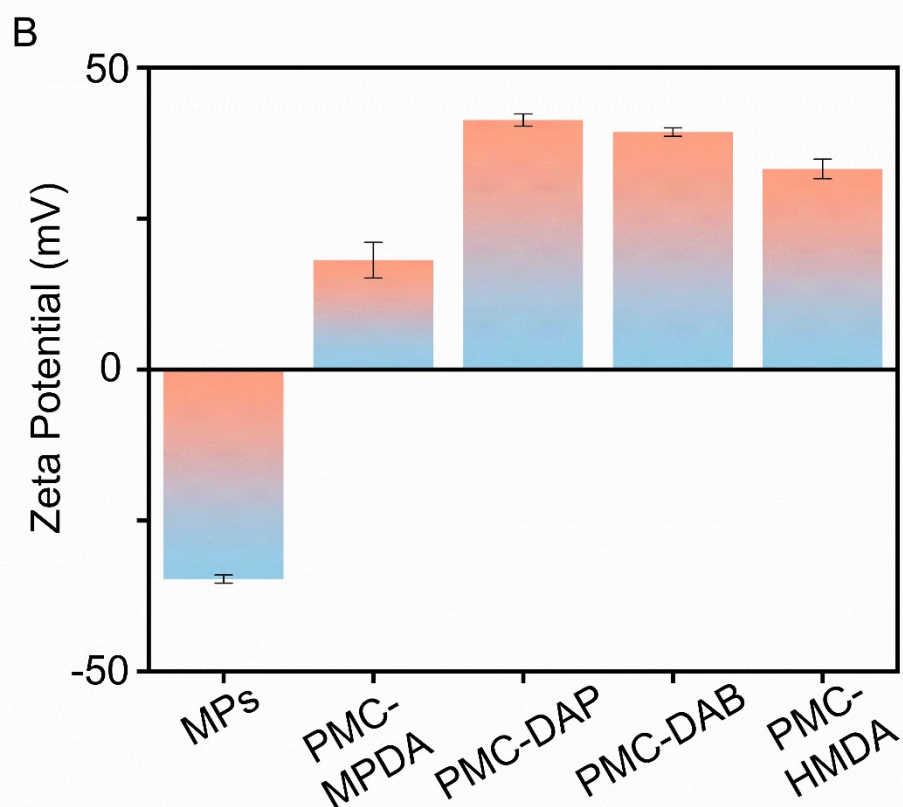

**Figure S8.** TGA curves (A) of PMCs. Zeta potential determinations (B) of MPs and PMCs.



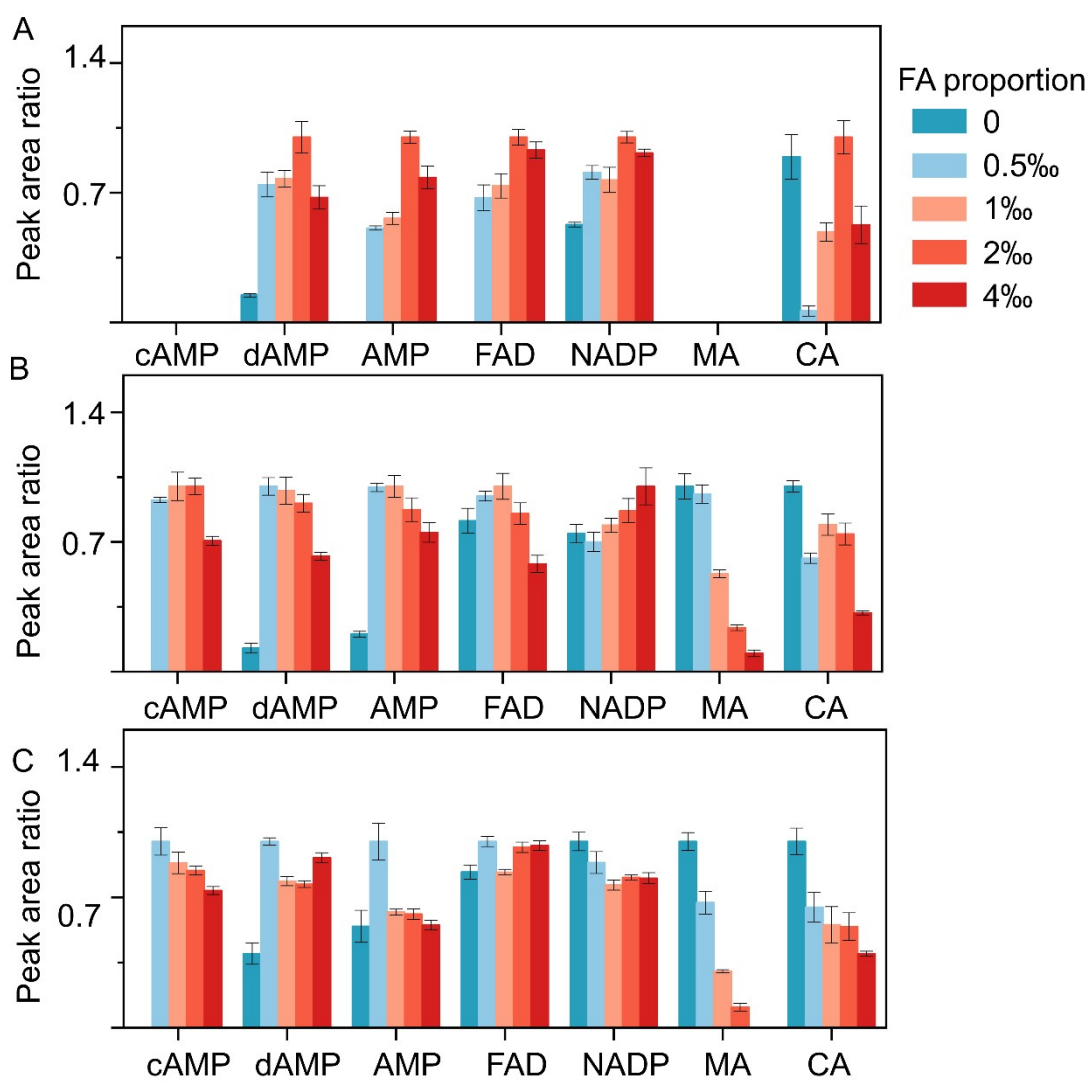

**Figure S9.** The optimization of formic acid proportion for adsorption of PMC-MPDA (A), PMC-DAP (B), and PMC-DAB (C).

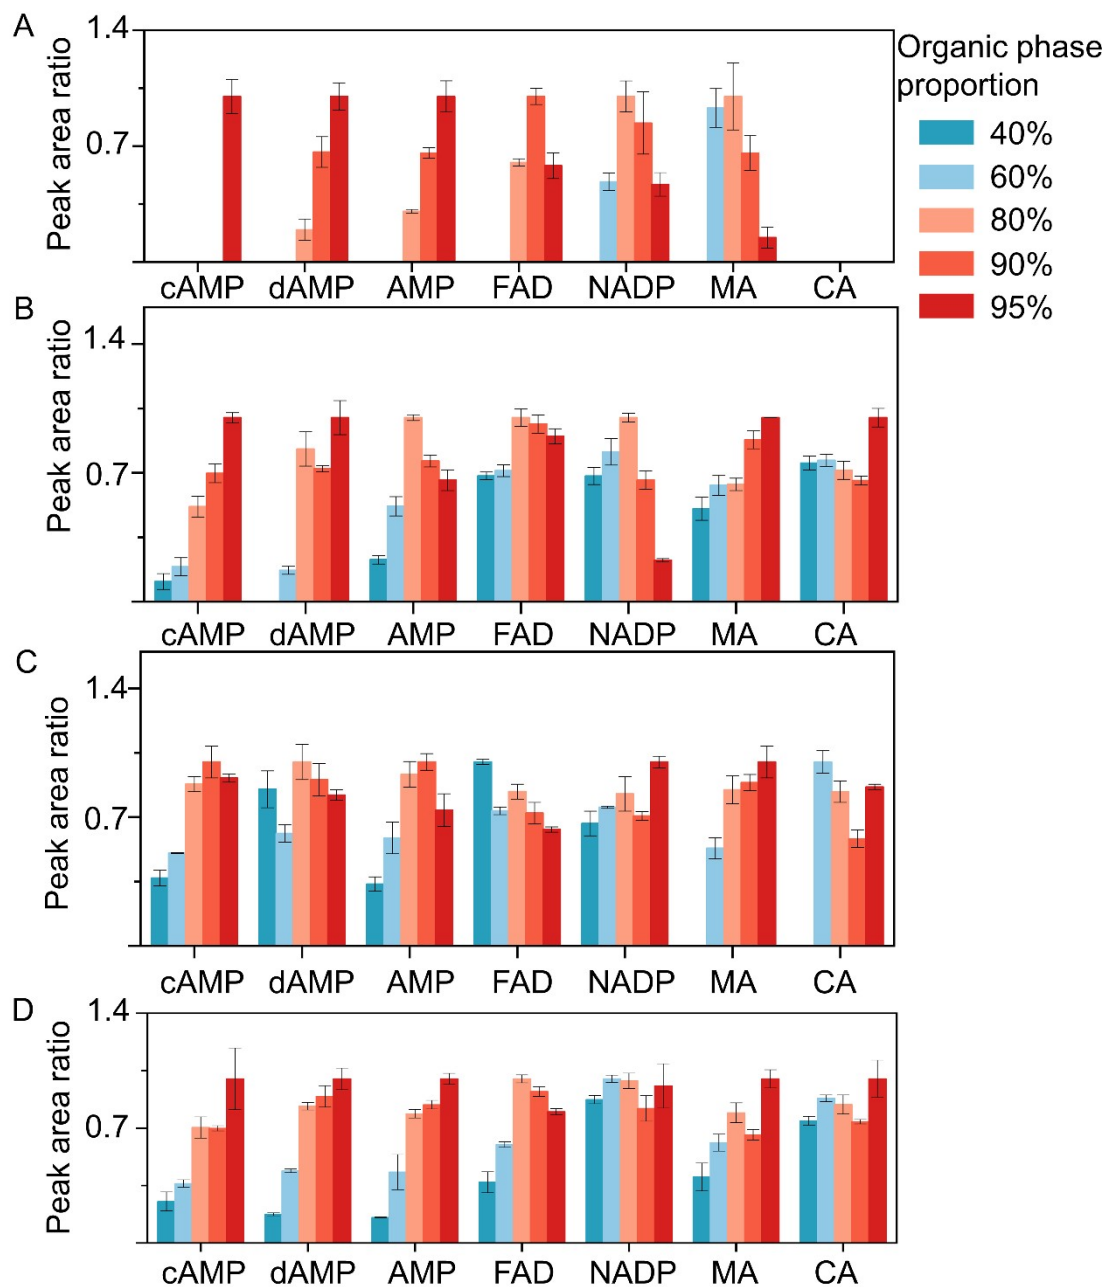

**Figure S10.** The optimization of organic phase proportion for adsorption of PMC-MPDA (A), PMC-DAP (B), PMC-DAB (C), and PMC-HMDA (D).

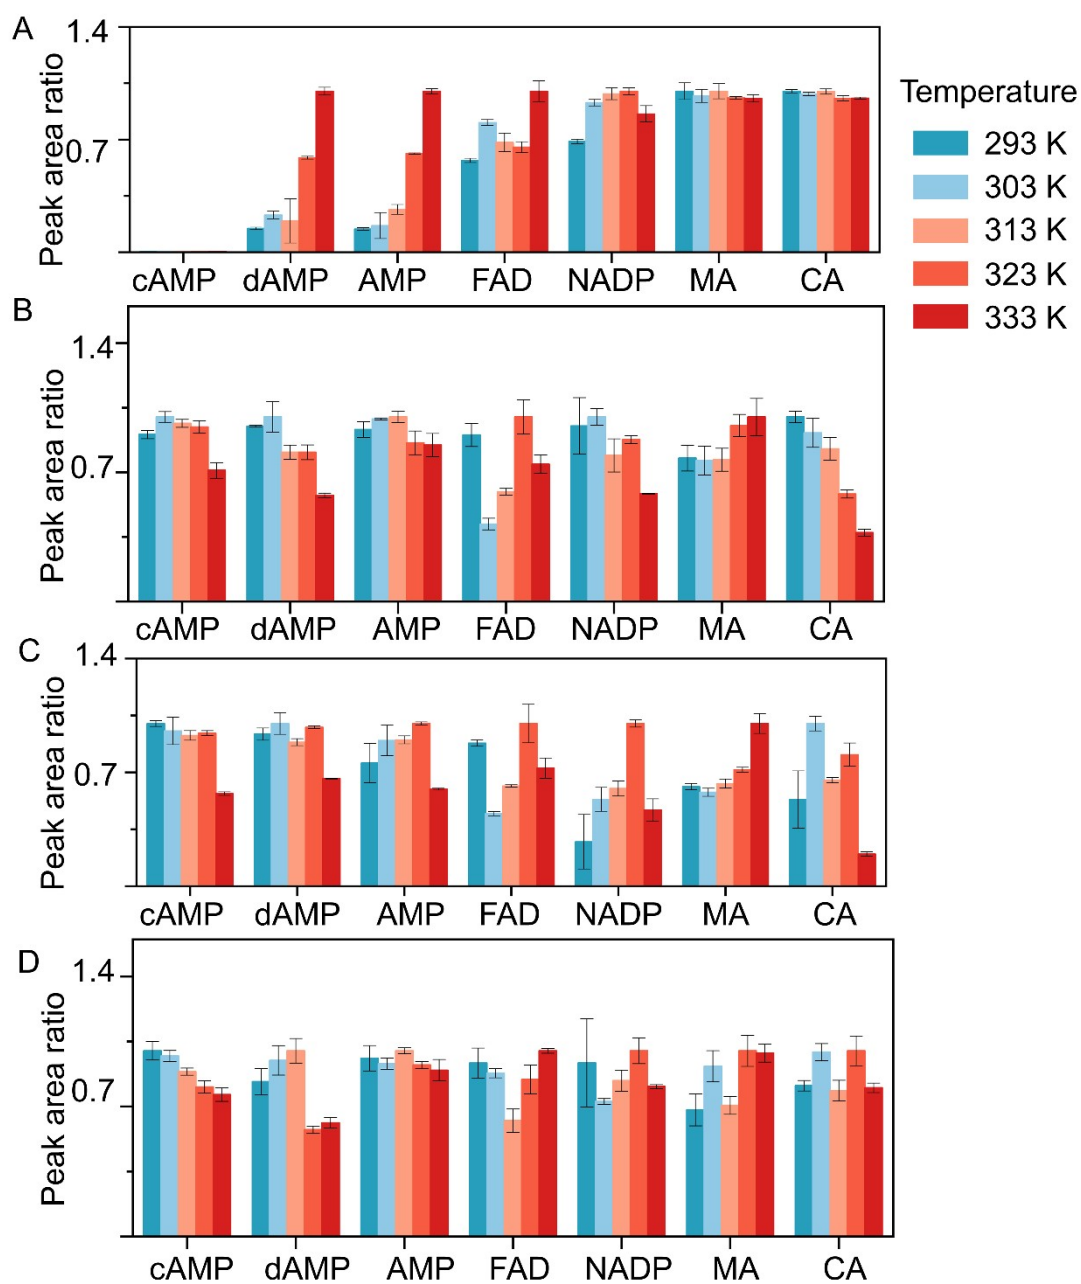

**Figure S11.** The optimization of temperature for adsorption of PMC-MPDA (A), PMC-DAP (B), PMC-DAB (C), and PMC-HMDA (D).

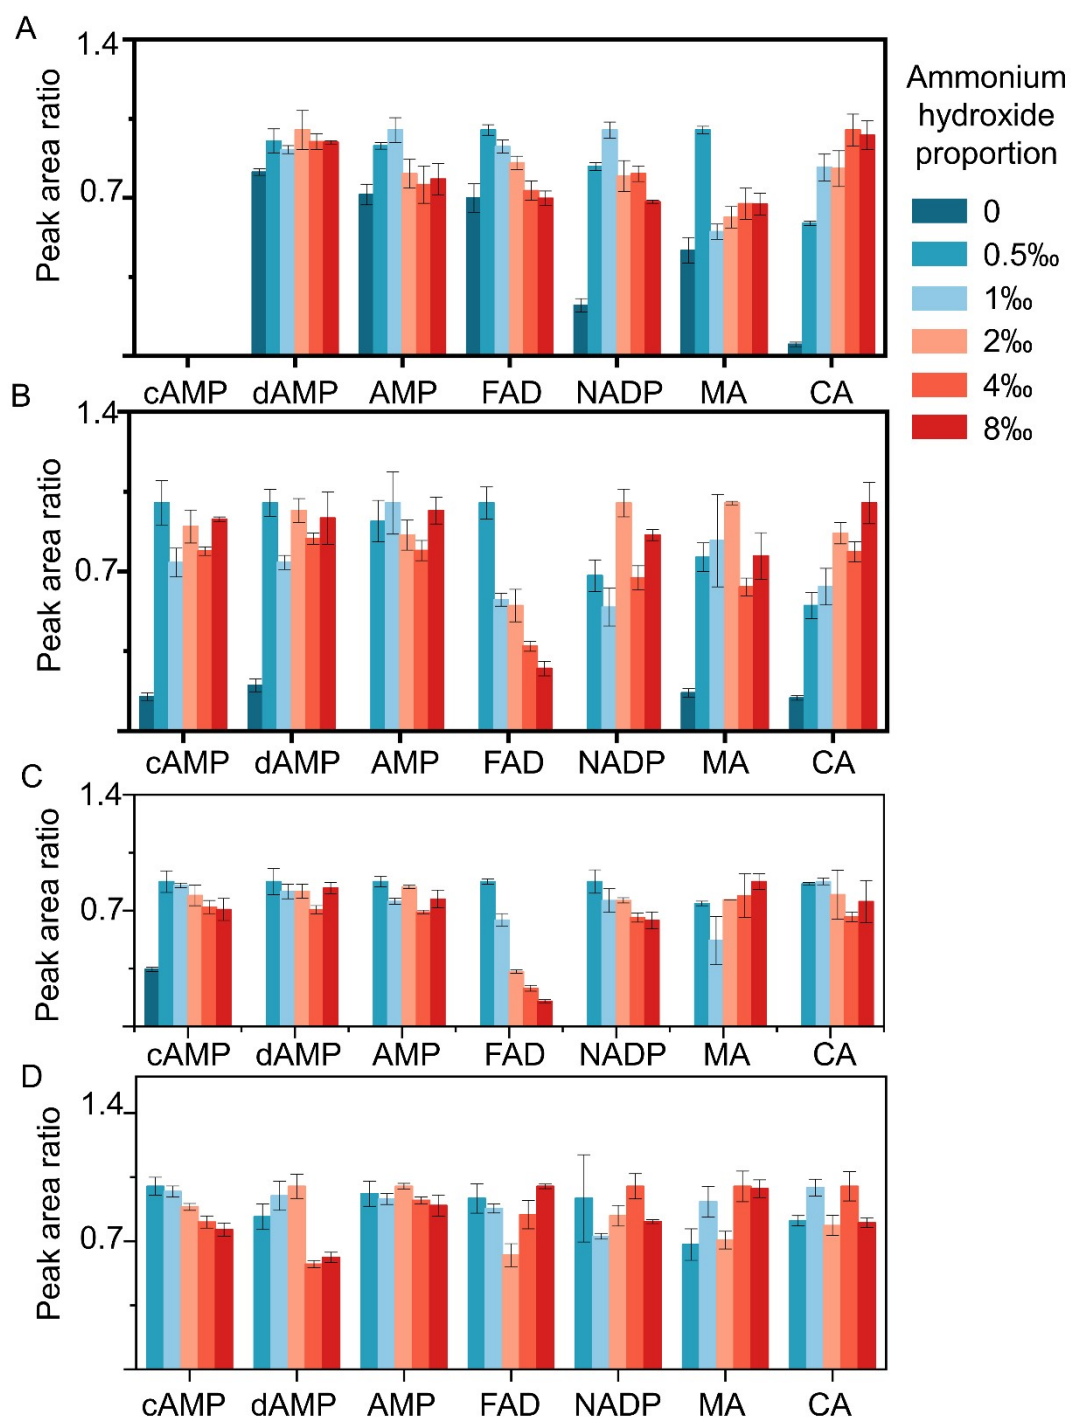

**Figure S12.** The optimization of ammonium hydroxide proportion for desorption of PMC-MPDA (A), PMC-DAP (B), PMC-DAB (C), and PMC-HMDA (D).

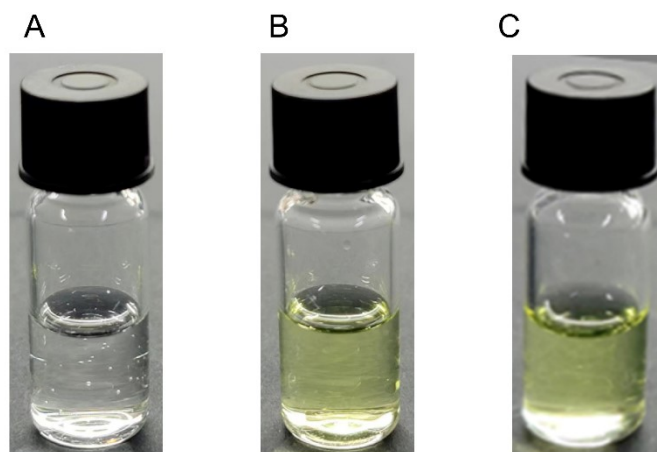

**Figure S13.** The adsorption (A) and desorption (B) phenomena can be observed visually in highly concentrated flavin adenine dinucleotide (FAD) solutions (C).

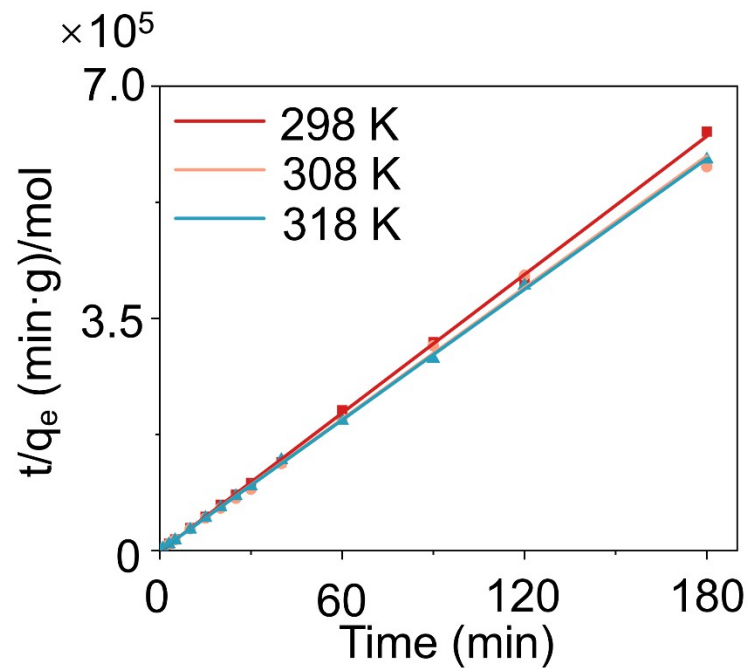

**Figure S14.** The enrichment performance of AMP solution with the same concentration at 298 K, 308 K, and 318 K.

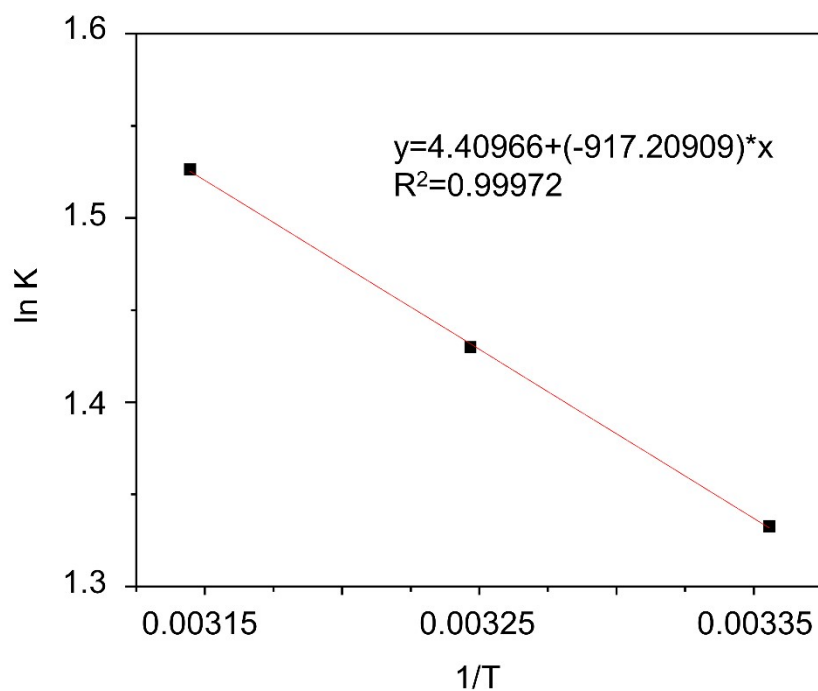

**Figure S15.** The enrichment performance of AMP solution with the same concentration at 298 K, 308 K, and 318 K: plot of 1/T and ln K.

**Table S5.** Thermodynamics parameters for adsorption of AMP on PMC-HMDA.

| T   | q <sub>e</sub> | ΔG <sup>0</sup> | ΔH <sup>0</sup> | ΔS <sup>0</sup> | R <sup>2</sup> |
|-----|----------------|-----------------|-----------------|-----------------|----------------|
| K   | μmol / g       | kJ / mol        | kJ / mol        | J / (mol K)     |                |
| 298 | 287.65         | -14.12          |                 |                 | 0.99941        |
| 308 | 302.65         | -14.67          | 7.63            | 36.66           | 0.99803        |
| 318 | 304.71         | -15.23          |                 |                 | 0.99973        |

**Table S6.** Parameters of pseudo-second-order kinetics model for adsorption of AMP on PMC-HMDA at various initial concentrations

| C <sub>0</sub> | q <sub>e</sub> | R <sup>2</sup> |
|----------------|----------------|----------------|
| μmol / L       | μmol / g       |                |
| 100            | 190.12         | 0.99995        |
| 130            | 215.28         | 0.99985        |
| 200            | 287.65         | 0.99941        |

**Table S7.** The LOD, linear range of the analysis method using LC-MS with PMC-HMDA.

| Analytes    | LODs | Linear range         | Calibration equation             | R <sup>2</sup> |
|-------------|------|----------------------|----------------------------------|----------------|
|             | pmol | μmol·L <sup>-1</sup> |                                  |                |
| AMP         | 0.2  | 0.05 - 10            | $y = -7.68488E-4 + 2.15723E-5*x$ | 0.99845        |
| IMP         | 0.5  | 0.05 - 10            | $y = 1.42975E-4 + 2.66932E-5*x$  | 0.99859        |
| GMP         | 2    | 0.5 - 6              | $y = 4.83081E-4 + 5.93532E-6*x$  | 0.99791        |
| cAMP        | 2    | 0.4 - 2              | $y = 1.79205E-4 + 5.34048E-6*x$  | 0.99704        |
| R5P         | 2    | 0.4 - 6              | $y = -6.40298E-4 + 4.20061E-6*x$ | 0.99728        |
| NADP        | 2    | 0.4 - 6              | $y = -0.00174 + 9.10526E-6*x$    | 0.99927        |
| CDP         | 2    | 0.4 - 6              | $y = -3.8988E-4 + 7.71932E-6*x$  | 0.99831        |
| Malic acid  | 0.5  | 0.5 - 2              | $y = 0.00704 + 1.27824E-5*x$     | 0.99886        |
| Citric acid | 1    | 0.2 - 6              | $y = -0.00599 + 3.09103E-5*x$    | 0.99984        |



**Table S8.** The precision of the analysis method using LC-MS with PMC-HMDA.

| Analytes    | Intra-day            |                      |       | Inter-day            |                      |        |
|-------------|----------------------|----------------------|-------|----------------------|----------------------|--------|
|             | experimental         | theoretical          | RSDs  | experimental         | theoretical          | RSDs   |
|             | nmol·L <sup>-1</sup> | nmol·L <sup>-1</sup> |       | nmol·L <sup>-1</sup> | nmol·L <sup>-1</sup> |        |
| AMP         | 616.62               | 600.00               | 2.77% | 639.66               | 600.00               | 6.61%  |
| IMP         | 610,38               | 600.00               | 1.73% | 631.26               | 600.00               | 5.21%  |
| GMP         | 2126.40              | 2000.00              | 6.32% | 2037.40              | 2000.00              | 1.87%  |
| cAMP        | 1040.70              | 1000.00              | 4.07% | 1029.00              | 1000.00              | 2.90%  |
| R5P         | 2062.80              | 2000.00              | 3.14% | 2053.20              | 2000.00              | 2.66%  |
| NADP        | 2072.60              | 2000.00              | 3.63% | 2208.40              | 2000.00              | 10.42% |
| CDP         | 2169.40              | 2000.00              | 8.47% | 2121.80              | 2000.00              | 6.09%  |
| Malic acid  | 1039.90              | 1000.00              | 3.99% | 1041.10              | 1000.00              | 4.11%  |
| Citric acid | 2047.80              | 2000.00              | 2.39% | 2016.40              | 2000.00              | 0.82%  |

**Table S9.** The accuracy of the analysis method using LC-MS with PMC-HMDA.

| Analytes    | Low concentration                    |                                     |                  | Middle concentration                 |                                     |                  | High concentration                   |                                     |                  | Average recovery rate |
|-------------|--------------------------------------|-------------------------------------|------------------|--------------------------------------|-------------------------------------|------------------|--------------------------------------|-------------------------------------|------------------|-----------------------|
|             | experimental<br>nmol·L <sup>-1</sup> | theoretical<br>nmol·L <sup>-1</sup> | recovery<br>rate | experimental<br>nmol·L <sup>-1</sup> | theoretical<br>nmol·L <sup>-1</sup> | recovery<br>rate | experimental<br>nmol·L <sup>-1</sup> | theoretical<br>nmol·L <sup>-1</sup> | recovery<br>rate |                       |
| AMP         | 517.92                               | 480.00                              | 119.12%          | 598.11                               | 600.00                              | 99.41%           | 743.84                               | 720.00                              | 105.44%          | 107.99%               |
| IMP         | 449.63                               | 480.00                              | 91.14%           | 617.15                               | 600.00                              | 103.71%          | 606.72                               | 720.00                              | 80.57%           | 91.80%                |
| GMP         | 1355.28                              | 1600.00                             | 78.35%           | 1788.03                              | 2000.00                             | 86.15%           | 2322.49                              | 2400.00                             | 95.98%           | 86.83%                |
| cAMP        | 795.84                               | 800.00                              | 98.80%           | 970.46                               | 1000.00                             | 94.58%           | 1274.25                              | 1200.00                             | 109.97%          | 101.11%               |
| R5P         | 1536.78                              | 1600.00                             | 94.36%           | 1938.42                              | 2000.00                             | 95.95%           | 2194.11                              | 2400.00                             | 89.28%           | 93.20%                |
| NADP        | 1482.29                              | 1600.00                             | 90.52%           | 1719.75                              | 2000.00                             | 82.93%           | 2423.45                              | 2400.00                             | 101.15%          | 91.53%                |
| CDP         | 1511.72                              | 1600.00                             | 93.53%           | 1882.40                              | 2000.00                             | 93.34%           | 2324.69                              | 2400.00                             | 96.52%           | 94.46%                |
| Malic acid  | 697.16                               | 800.00                              | 80.51%           | 976.00                               | 1000.00                             | 96.70%           | 1173.19                              | 1200.00                             | 97.11%           | 91.44%                |
| Citric acid | 1391.80                              | 1600.00                             | 82.21%           | 1571.23                              | 2000.00                             | 72.70%           | 2338.62                              | 2400.00                             | 96.89%           | 83.93%                |

**Table S10.** The precision at LLOQ of the analysis method using LC-MS with PMC-HMDA.

| Analytes    | Intra-day            |                      |        | Inter-day            |                      |        |
|-------------|----------------------|----------------------|--------|----------------------|----------------------|--------|
|             | experimental         | theoretical          | RSDs   | experimental         | theoretical          | RSDs   |
|             | nmol·L <sup>-1</sup> | nmol·L <sup>-1</sup> |        | nmol·L <sup>-1</sup> | nmol·L <sup>-1</sup> |        |
| AMP         | 56.04                | 50.00                | 12.08% | 57.07                | 50.00                | 14,14% |
| IMP         | 48.38                | 50.00                | 3.25%  | 47.81                | 50.00                | 4.38%  |
| GMP         | 482.15               | 500.00               | 3.57%  | 477.05               | 500.00               | 4.59%  |
| cAMP        | 368.24               | 400.00               | 7.94%  | 356.76               | 400.00               | 10.81% |
| R5P         | 343.48               | 400.00               | 14.13% | 321.16               | 400.00               | 19.71% |
| NADP        | 364.28               | 400.00               | 8.93%  | 343.80               | 400.00               | 14.05% |
| CDP         | 373.20               | 400.00               | 6.70%  | 345.88               | 400.00               | 13.53% |
| Malic acid  | 522.80               | 500.00               | 4.56%  | 531.05               | 500.00               | 6.21%  |
| Citric acid | 221.24               | 200.00               | 10.62% | 232.92               | 200.00               | 16.46% |

Table S11. The accuracy at LLOQ of the analysis method using LC-MS with PMC-HMDA.

| Analytes    | Low concentration                    |                                     |                  | Middle concentration                 |                                     |                  | High concentration                   |                                     |                  | Average recovery rate |
|-------------|--------------------------------------|-------------------------------------|------------------|--------------------------------------|-------------------------------------|------------------|--------------------------------------|-------------------------------------|------------------|-----------------------|
|             | experimental<br>nmol·L <sup>-1</sup> | theoretical<br>nmol·L <sup>-1</sup> | recovery<br>rate | experimental<br>nmol·L <sup>-1</sup> | theoretical<br>nmol·L <sup>-1</sup> | recovery<br>rate | experimental<br>nmol·L <sup>-1</sup> | theoretical<br>nmol·L <sup>-1</sup> | recovery<br>rate |                       |
| AMP         | 56.95                                | 40.00                               | 142.38%          | 65.62                                | 50.00                               | 131.24%          | 80.09                                | 80.00                               | 100.11%          | 124.58%               |
| IMP         | 32.12                                | 40.00                               | 80.30%           | 44.25                                | 50.00                               | 88.50%           | 78.49                                | 80.00                               | 80.57%           | 83.12%                |
| GMP         | 355.99                               | 400.00                              | 89.00%           | 379.67                               | 500.00                              | 74.73%           | 748.40                               | 800.00                              | 93.55%           | 85.76%                |
| cAMP        | 231.40                               | 300.00                              | 77.13%           | 354.17                               | 400.00                              | 88.54%           | 509.07                               | 500.00                              | 101.81%          | 89.16%                |
| R5P         | 313.15                               | 300.00                              | 104.38%          | 364.85                               | 400.00                              | 91.21%           | 383.10                               | 500.00                              | 76.62%           | 90.74%                |
| NADP        | 319.33                               | 300.00                              | 106.44%          | 341.21                               | 400.00                              | 85.30%           | 601.41                               | 500.00                              | 120.28%          | 104.01%               |
| CDP         | 264.61                               | 300.00                              | 88.10%           | 356.69                               | 400.00                              | 89.17%           | 581.21                               | 500.00                              | 116.24%          | 97.84%                |
| Malic acid  | 411.81                               | 400.00                              | 102.95%          | 497.40                               | 500.00                              | 99.48%           | 778.03                               | 800.00                              | 94.88%           | 90.10%                |
| Citric acid | 135.60                               | 100.00                              | 135.60%          | 228.25                               | 200.00                              | 114.12%          | 423.01                               | 400.00                              | 105.75%          | 118.49%               |

**Table S12.** The retention time of the standards and cell using HPLC-MS/MS with PMC-HMDA.

---

| <b>Analytes</b> | <b>Retention time (min)</b> |             |
|-----------------|-----------------------------|-------------|
|                 | <b>standards</b>            | <b>cell</b> |
| AMP             | 9.46                        | 9.54        |
| IMP             | 9.96                        | 9.93        |
| GMP             | 9.80                        | 9.86        |
| ADP             | 10.14                       | 10.06       |
| CDP             | 10.16                       | 10.07       |
| ATP             | 13.58                       | 13.50       |
| NAD             | 11.97                       | 12.11       |

---

**Table S13.** The list of anionic metabolites putatively identified based on accurate mass match with the HMDB metabolites.

| No.                | Metabolites | Molecular formula                                                             | Theoretical | Experimental | Accuracy | Samples |       |       |
|--------------------|-------------|-------------------------------------------------------------------------------|-------------|--------------|----------|---------|-------|-------|
|                    |             |                                                                               | m/z         | m/z          | ppm      | Cell    | Liver | Serum |
| <b>Nucleotides</b> |             |                                                                               |             |              |          |         |       |       |
| 1                  | AMP/dGMP    | C <sub>10</sub> H <sub>14</sub> N <sub>5</sub> O <sub>7</sub> P               | 346.0558    | 346.0557     | -0.3     | √       | √     | √     |
| 2                  | GMP         | C <sub>10</sub> H <sub>14</sub> N <sub>5</sub> O <sub>8</sub> P               | 362.0507    | 362.0506     | -0.3     | √       | √     |       |
| 3                  | CMP         | C <sub>9</sub> H <sub>14</sub> N <sub>3</sub> O <sub>8</sub> P                | 322.0446    | 322.0444     | -0.6     | √       | √     |       |
| 4                  | UMP         | C <sub>9</sub> H <sub>13</sub> N <sub>2</sub> O <sub>9</sub> P                | 323.0286    | 323.0285     | -0.3     | √       | √     |       |
| 5                  | ADP         | C <sub>10</sub> H <sub>15</sub> N <sub>5</sub> O <sub>10</sub> P <sub>2</sub> | 426.0221    | 426.0222     | 0.2      | √       | √     | √     |
| 6                  | GDP         | C <sub>10</sub> H <sub>15</sub> N <sub>5</sub> O <sub>11</sub> P <sub>2</sub> | 442.0171    | 442.0171     | 0.0      | √       | √     | √     |
| 7                  | UDP         | C <sub>9</sub> H <sub>14</sub> N <sub>2</sub> O <sub>12</sub> P <sub>2</sub>  | 402.9949    | 402.9949     | 0.0      | √       | √     |       |
| 8                  | CDP         | C <sub>9</sub> H <sub>15</sub> N <sub>3</sub> O <sub>11</sub> P <sub>2</sub>  | 402.0109    | 402.0109     | 0.0      | √       | √     |       |
| 9                  | ATP/dGTP    | C <sub>10</sub> H <sub>16</sub> N <sub>5</sub> O <sub>13</sub> P <sub>3</sub> | 505.9885    | 505.9885     | 0.0      | √       | √     |       |
| 10                 | GTP         | C <sub>10</sub> H <sub>16</sub> N <sub>5</sub> O <sub>14</sub> P <sub>3</sub> | 521.9834    | 521.9835     | 0.2      | √       | √     |       |
| 11                 | CTP         | C <sub>9</sub> H <sub>16</sub> N <sub>3</sub> O <sub>14</sub> P <sub>3</sub>  | 481.9772    | 481.9773     | 0.2      | √       |       |       |
| 12                 | UTP         | C <sub>9</sub> H <sub>15</sub> N <sub>2</sub> O <sub>15</sub> P <sub>3</sub>  | 482.9613    | 482.9614     | 0.2      | √       |       |       |
| 13                 | dAMP        | C <sub>10</sub> H <sub>14</sub> N <sub>5</sub> O <sub>6</sub> P               | 330.0609    | 330.0609     | 0.0      | √       |       |       |
| 14                 | dTMP        | C <sub>10</sub> H <sub>15</sub> N <sub>2</sub> O <sub>8</sub> P               | 321.0493    | 321.0493     | -0.1     | √       |       |       |

| No. | Metabolites            | Molecular formula                                                                      | Theoretical | Experimental | Accuracy | Intensity |      |       |
|-----|------------------------|----------------------------------------------------------------------------------------|-------------|--------------|----------|-----------|------|-------|
|     |                        |                                                                                        | m/z         | m/z          |          | ppm       | Cell | Liver |
| 15  | dADP                   | C <sub>10</sub> H <sub>15</sub> N <sub>5</sub> O <sub>9</sub> P <sub>2</sub>           | 410.0272    | 410.0273     | 0.2      | √         | √    | √     |
| 16  | dUDP                   | C <sub>9</sub> H <sub>14</sub> N <sub>2</sub> O <sub>11</sub> P <sub>2</sub>           | 387.000006  | 387.0002     | 0.5      | √         | √    |       |
| 17  | dTDP                   | C <sub>10</sub> H <sub>16</sub> N <sub>2</sub> O <sub>11</sub> P <sub>2</sub>          | 401.0157    | 401.0157     | 0.0      | √         |      | √     |
| 18  | dCDP                   | C <sub>9</sub> H <sub>15</sub> N <sub>3</sub> O <sub>10</sub> P <sub>2</sub>           | 386.016     | 386.0160     | 0.0      | √         |      | √     |
| 19  | dATP                   | C <sub>10</sub> H <sub>16</sub> N <sub>5</sub> O <sub>12</sub> P <sub>3</sub>          | 489.9936    | 489.9938     | 0.4      | √         |      |       |
| 20  | dTTP                   | C <sub>10</sub> H <sub>17</sub> N <sub>2</sub> O <sub>14</sub> P <sub>3</sub>          | 480.982     | 480.9820     | 0.0      | √         |      |       |
| 21  | dCTP                   | C <sub>9</sub> H <sub>16</sub> N <sub>3</sub> O <sub>13</sub> P <sub>3</sub>           | 465.9823    | 465.9825     | 0.4      | √         |      |       |
| 22  | dUTP                   | C <sub>9</sub> H <sub>15</sub> N <sub>2</sub> O <sub>14</sub> P <sub>3</sub>           | 466.966337  | 466.9671     | 1.6      | √         |      |       |
| 23  | dIDP                   | C <sub>10</sub> H <sub>14</sub> N <sub>4</sub> O <sub>10</sub> P <sub>2</sub>          | 411.011239  | 411.0114     | 0.3      |           |      | √     |
| 24  | CH <sub>3</sub> -AMP   | C <sub>10</sub> H <sub>14</sub> N <sub>5</sub> O <sub>7</sub> P-CH <sub>3</sub>        | 360.071458  | 360.0713     | -0.4     | √         | √    | √     |
| 25  | CH <sub>2</sub> OH-AMP | C <sub>10</sub> H <sub>14</sub> N <sub>5</sub> O <sub>7</sub> P-<br>CH <sub>2</sub> OH | 376.066373  | 376.0664     | 0.2      | √         |      |       |
| 26  | CH <sub>3</sub> -GMP   | C <sub>10</sub> H <sub>14</sub> N <sub>5</sub> O <sub>8</sub> P                        | 362.050723  | 362.0507     | 0.0      | √         | √    | √     |
| 27  | NADP                   | C <sub>21</sub> H <sub>28</sub> N <sub>7</sub> O <sub>17</sub> P <sub>3</sub>          | 742.0682    | 742.0679     | -0.5     | √         |      |       |
| 28  | NADP                   | C <sub>21</sub> H <sub>28</sub> N <sub>7</sub> O <sub>17</sub> P <sub>3</sub>          | 370.5305    | 370.5305     | 0.0      | √         | √    |       |
| 29  | NADPH                  | C <sub>21</sub> H <sub>30</sub> N <sub>7</sub> O <sub>17</sub> P <sub>3</sub>          | 744.083826  | 744.0838     | 0.0      | √         |      |       |

| No.                  | Metabolites | Molecular formula                                                              | Theoretical | Experimental | Accuracy | Intensity |      |       |
|----------------------|-------------|--------------------------------------------------------------------------------|-------------|--------------|----------|-----------|------|-------|
|                      |             |                                                                                | m/z         | m/z          |          | ppm       | Cell | Liver |
| 30                   | NADPH       | C <sub>21</sub> H <sub>30</sub> N <sub>7</sub> O <sub>17</sub> P <sub>3</sub>  | 371.538     | 371.5382     | 0.5      | √         | √    |       |
| 31                   | NAD         | C <sub>21</sub> H <sub>27</sub> N <sub>7</sub> O <sub>14</sub> P <sub>2</sub>  | 662.1018    | 662.1021     | 0.5      | √         | √    |       |
| 32                   | FAD         | C <sub>27</sub> H <sub>33</sub> N <sub>9</sub> O <sub>15</sub> P <sub>2</sub>  | 391.5713    | 391.5713     | 0.1      | √         | √    | √     |
| 33                   | FAD         | C <sub>27</sub> H <sub>33</sub> N <sub>9</sub> O <sub>15</sub> P <sub>2</sub>  | 784.1499    | 784.1493     | -0.8     | √         |      |       |
| 34                   | cFMN        | C <sub>17</sub> H <sub>19</sub> N <sub>4</sub> O <sub>8</sub> P                | 437.086774  | 437.0867     | -0.1     |           | √    |       |
| 35                   | AICAR       | C <sub>9</sub> H <sub>15</sub> N <sub>4</sub> O <sub>8</sub> P                 | 337.055474  | 337.0558     | 1.0      |           | √    |       |
| 36                   | SAICAR      | C <sub>13</sub> H <sub>19</sub> N <sub>4</sub> O <sub>12</sub> P               | 453.066432  | 453.0665     | 0.2      |           | √    |       |
| 37                   | IMP         | C <sub>10</sub> H <sub>13</sub> N <sub>4</sub> O <sub>8</sub> P                | 347.0398    | 347.0398     | 0.0      | √         | √    |       |
| 38                   | AP4A        | C <sub>20</sub> H <sub>28</sub> N <sub>10</sub> O <sub>19</sub> P <sub>4</sub> | 835.040988  | 835.0409     | -0.1     | √         |      |       |
| 39                   | cADPR       | C <sub>15</sub> H <sub>21</sub> N <sub>5</sub> O <sub>13</sub> P <sub>2</sub>  | 540.0538    | 540.0537     | -0.1     | √         | √    |       |
| 40                   | cTMP        | C <sub>10</sub> H <sub>13</sub> N <sub>2</sub> O <sub>7</sub> P                | 303.038761  | 303.0387     | -0.2     | √         |      |       |
| 41                   | cAMP        | C <sub>10</sub> H <sub>12</sub> N <sub>5</sub> O <sub>6</sub> P                | 328.045243  | 328.0452     | 0.0      | √         | √    |       |
| 42                   | cGMP        | C <sub>10</sub> H <sub>12</sub> N <sub>5</sub> O <sub>7</sub> P                | 344.040158  | 344.0404     | 0.6      |           |      | √     |
| 43                   | IAA-RP      | C <sub>10</sub> H <sub>15</sub> N <sub>2</sub> O <sub>9</sub> P                | 337.0442    | 337.0441     | -0.2     |           | √    |       |
| <b>Carbohydrates</b> |             |                                                                                |             |              |          |           |      |       |
| 44                   | G6P         | C <sub>6</sub> H <sub>13</sub> O <sub>9</sub> P                                | 259.0224    | 259.0225     | 0.3      | √         |      |       |



| No. | Metabolites                         | Molecular formula                                                             | Theoretical | Experimental | Accuracy | Intensity |      |       |
|-----|-------------------------------------|-------------------------------------------------------------------------------|-------------|--------------|----------|-----------|------|-------|
|     |                                     |                                                                               | m/z         | m/z          |          | ppm       | Cell | Liver |
| 45  | Rib-1,5-P2                          | C <sub>5</sub> H <sub>12</sub> O <sub>11</sub> P <sub>2</sub>                 | 308.978208  | 308.9779     | -1.1     | √         |      |       |
| 46  | GLCN-6-P                            | C <sub>6</sub> H <sub>14</sub> NO <sub>8</sub> P                              | 258.0384    | 258.0384     | -0.2     | √         |      |       |
| 47  | 6PG                                 | C <sub>6</sub> H <sub>13</sub> O <sub>10</sub> P                              | 275.0174    | 275.0171     | -1.0     | √         |      |       |
| 48  | FDP                                 | C <sub>6</sub> H <sub>13</sub> O <sub>10</sub> P                              | 338.9888    | 338.9887     | -0.2     | √         | √    | √     |
| 49  | PRPP                                | C <sub>5</sub> H <sub>13</sub> O <sub>14</sub> P <sub>3</sub>                 | 388.944538  | 388.9447     | 0.3      | √         |      |       |
| 50  | UDPG/UDP-GLC                        | C <sub>15</sub> H <sub>24</sub> N <sub>2</sub> O <sub>17</sub> P <sub>2</sub> | 565.0477    | 565.0477     | -0.1     | √         | √    |       |
| 51  | UDP-Glc-Nac                         | C <sub>17</sub> H <sub>27</sub> N <sub>3</sub> O <sub>17</sub> P <sub>2</sub> | 302.5335    | 302.5334     | -0.3     | √         | √    |       |
| 52  | UDP-Glc-Nac                         | C <sub>17</sub> H <sub>27</sub> N <sub>3</sub> O <sub>17</sub> P <sub>2</sub> | 606.0743    | 606.0743     | 0.1      | √         | √    | √     |
| 53  | UDP-GlcUA                           | C <sub>15</sub> H <sub>22</sub> N <sub>2</sub> O <sub>18</sub> P <sub>2</sub> | 579.027008  | 579.0272     | 0.3      | √         | √    |       |
| 54  | dTDP-D-glucose                      | C <sub>16</sub> H <sub>26</sub> N <sub>2</sub> O <sub>16</sub> P <sub>2</sub> | 563.0685    | 563.0685     | 0.0      | √         | √    |       |
| 55  | Adenylosuccinic acid                | C <sub>14</sub> H <sub>18</sub> N <sub>5</sub> O <sub>11</sub> P              | 462.066767  | 462.0670     | 0.4      | √         | √    |       |
| 56  | UDP-Apiose                          | C <sub>14</sub> H <sub>22</sub> N <sub>2</sub> O <sub>16</sub> P <sub>2</sub> | 535.037179  | 535.0371     | -0.1     | √         | √    |       |
| 57  | Sedoheptulose-7-P                   | C <sub>7</sub> H <sub>15</sub> O <sub>10</sub> P                              | 289.033     | 289.0327     | -1.0     | √         | √    |       |
| 58  | GlcNAc6p                            | C <sub>8</sub> H <sub>16</sub> NO <sub>9</sub> P                              | 300.049     | 300.0487     | -1.2     | √         | √    |       |
| 59  | GDP-fucose                          | C <sub>16</sub> H <sub>25</sub> N <sub>5</sub> O <sub>15</sub> P <sub>2</sub> | 588.074962  | 588.0750     | 0.0      | √         | √    |       |
| 60  | monophospho-n-acetylneuraminic acid | C <sub>11</sub> H <sub>20</sub> NO <sub>12</sub> P                            | 388.065035  | 388.0652     | 0.3      | √         | √    |       |

| No. | Metabolites                     | Molecular formula                                                             | Theoretical | Experimental | Accuracy | Intensity |      |       |
|-----|---------------------------------|-------------------------------------------------------------------------------|-------------|--------------|----------|-----------|------|-------|
|     |                                 |                                                                               | m/z         | m/z          |          | ppm       | Cell | Liver |
| 61  | I6P                             | C <sub>6</sub> H <sub>13</sub> O <sub>9</sub> P                               | 259.022442  | 259.0225     | 0.2      | √         | √    |       |
| 62  | D-myo-Inositol 1,4-bisphosphate | C <sub>6</sub> H <sub>14</sub> O <sub>12</sub> P <sub>2</sub>                 | 338.988772  | 338.9887     | -0.2     | √         |      | √     |
| 63  | IP3                             | C <sub>6</sub> H <sub>15</sub> O <sub>15</sub> P <sub>3</sub>                 | 418.955103  | 418.9552     | 0.2      | √         |      |       |
| 64  | GroPIns                         | C <sub>9</sub> H <sub>19</sub> O <sub>11</sub> P                              | 333.05922   | 333.0590     | -0.8     | √         | √    |       |
| 65  | DHAP(O-18:0)                    | C <sub>21</sub> H <sub>43</sub> O <sub>6</sub> P                              | 421.272449  | 421.2724     | -0.1     |           |      | √     |
| 66  | D-4'-phosphopantothenate        | C <sub>9</sub> H <sub>18</sub> NO <sub>8</sub> P                              | 298.0697    | 298.0696     | -0.3     |           | √    |       |
| 67  | Nicotinamide ribotide           | C <sub>11</sub> H <sub>16</sub> N <sub>2</sub> O <sub>8</sub> P               | 334.055808  | 334.0557     | -0.3     |           |      | √     |
| 68  | D-myo-Inositol 1,4-bisphosphate | C <sub>6</sub> H <sub>14</sub> O <sub>12</sub> P <sub>2</sub>                 | 338.988773  | 338.9887     | -0.2     | √         | √    |       |
| 69  | Diphosphoglucuronic acid        | C <sub>6</sub> H <sub>12</sub> O <sub>13</sub> P <sub>2</sub>                 | 352.968037  | 352.9681     | 0.2      |           | √    |       |
|     | <b>phosphate ester</b>          |                                                                               |             |              |          |           |      |       |
| 70  | Phosphoribosyl-AMP              | C <sub>15</sub> H <sub>23</sub> N <sub>5</sub> O <sub>14</sub> P <sub>2</sub> | 558.064397  | 558.0644     | 0.0      | √         | √    |       |
| 71  | CDP-ethanolamine                | C <sub>11</sub> H <sub>20</sub> N <sub>4</sub> O <sub>11</sub> P <sub>2</sub> | 445.053104  | 445.0531     | 0.1      |           | √    |       |
| 72  | ADP-ribose 2'-phosphate         | C <sub>15</sub> H <sub>24</sub> N <sub>5</sub> O <sub>17</sub> P <sub>3</sub> | 638.030727  | 638.0308     | 0.1      | √         | √    |       |
| 73  | Cmp-nana                        | C <sub>20</sub> H <sub>31</sub> N <sub>4</sub> O <sub>16</sub> P              | 613.139991  | 613.1399     | -0.2     | √         |      |       |
| 74  | O-acetyl-ADP-ribose             | C <sub>17</sub> H <sub>25</sub> N <sub>5</sub> O <sub>15</sub> P <sub>2</sub> | 600.074962  | 600.07439    | -1.0     |           | √    |       |
| 75  | Guanosine diphosphate mannose   | C <sub>16</sub> H <sub>25</sub> N <sub>5</sub> O <sub>16</sub> P <sub>2</sub> | 604.069877  | 604.06933    | -0.9     | √         | √    |       |

| No. | Metabolites                               | Molecular formula                                                             | Theoretical | Experimental | Accuracy | Intensity |       |       |
|-----|-------------------------------------------|-------------------------------------------------------------------------------|-------------|--------------|----------|-----------|-------|-------|
|     |                                           |                                                                               | m/z         | m/z          | ppm      | Cell      | Liver | Serum |
| 76  | Uridine diphosphate-N-acetylgalactosamine | C <sub>17</sub> H <sub>27</sub> N <sub>3</sub> O <sub>17</sub> P <sub>2</sub> | 606.074293  | 606.07414    | -0.3     | √         |       |       |
|     | <b>Cholic acid</b>                        |                                                                               |             |              |          |           |       |       |
| 77  | Deoxycholic acid                          | C <sub>24</sub> H <sub>40</sub> O <sub>4</sub>                                | 391.285383  | 391.2854     | 0.0      | √         | √     | √     |
| 78  | Cholic acid                               | C <sub>24</sub> H <sub>40</sub> O <sub>5</sub>                                | 407.280298  | 407.2802     | -0.4     |           | √     | √     |
| 79  | Glycocholic acid                          | C <sub>26</sub> H <sub>43</sub> NO <sub>6</sub>                               | 464.301762  | 464.3016     | -0.5     | √         | √     | √     |
| 80  | Deoxycholic acid 3-glucuronide            | C <sub>30</sub> H <sub>48</sub> O <sub>10</sub>                               | 567.317471  | 567.3175     | 0.0      |           |       | √     |
| 81  | Deoxycholic acid glycine conjugate        | C <sub>26</sub> H <sub>43</sub> NO <sub>5</sub>                               | 448.306847  | 448.3068     | -0.2     |           |       | √     |
| 82  | Bilirubin                                 | C <sub>33</sub> H <sub>36</sub> N <sub>4</sub> O <sub>6</sub>                 | 583.256208  | 583.2566     | 0.6      |           | √     |       |
| 83  | 3b-Hydroxy-5-cholenoic acid               | C <sub>24</sub> H <sub>38</sub> O <sub>3</sub>                                | 373.274819  | 373.2748     | 0.1      |           | √     |       |
| 84  | 24-Nor Ursodeoxycholic Acid               | C <sub>23</sub> H <sub>38</sub> O <sub>4</sub>                                | 377.269733  | 377.2697     | 0.0      | √         | √     | √     |
| 85  | 12-Ketodeoxycholic acid                   | C <sub>24</sub> H <sub>38</sub> O <sub>4</sub>                                | 389.269733  | 389.2697     | 0.0      | √         | √     | √     |
| 86  | 7alpha-Hydroxy-3-oxo-4-cholestenoate      | C <sub>27</sub> H <sub>42</sub> O <sub>4</sub>                                | 429.301033  | 429.3010     | 0.0      | √         |       | √     |
| 87  | Deoxycholylalanine                        | C <sub>27</sub> H <sub>45</sub> NO <sub>5</sub>                               | 462.322497  | 462.3227     | 0.4      |           |       | √     |
| 88  | Chenodeoxycholic acid sulfate             | C <sub>24</sub> H <sub>40</sub> O <sub>7</sub> S                              | 471.242198  | 471.2422     | -0.1     |           | √     |       |
| 89  | 7-Sulfocholic acid                        | C <sub>24</sub> H <sub>40</sub> O <sub>8</sub> S                              | 487.237113  | 487.2372     | 0.2      |           | √     |       |
| 90  | Deoxycholylthreonine                      | C <sub>28</sub> H <sub>47</sub> NO <sub>6</sub>                               | 492.333062  | 492.3333     | 0.5      | √         |       | √     |

| No.           | Metabolites                               | Molecular formula                                           | Theoretical | Experimental | Accuracy | Intensity |      |       |
|---------------|-------------------------------------------|-------------------------------------------------------------|-------------|--------------|----------|-----------|------|-------|
|               |                                           |                                                             | m/z         | m/z          |          | ppm       | Cell | Liver |
| 91            | Sulfolithocholyglycine                    | C <sub>26</sub> H <sub>43</sub> NO <sub>7</sub> S           | 512.268747  | 512.2687     | 0.0      |           | √    | √     |
| 92            | Cholyisoleucine                           | C <sub>30</sub> H <sub>51</sub> NO <sub>6</sub>             | 520.364362  | 520.3639     | -0.9     | √         |      | √     |
| 93            | Cholic acid glucuronide                   | C <sub>30</sub> H <sub>48</sub> O <sub>11</sub>             | 583.312386  | 583.31239    | 0.0      |           | √    | √     |
| <b>Others</b> |                                           |                                                             |             |              |          |           |      |       |
| 94            | Malic acid                                | C <sub>4</sub> H <sub>6</sub> O <sub>5</sub>                | 133.014247  | 133.0144     | 1.3      | √         |      |       |
| 95            | 3-Fluoro-2-oxopropanoic acid              | C <sub>3</sub> H <sub>3</sub> FO <sub>3</sub>               | 104.999346  | 104.9993     | -0.3     | √         |      |       |
| 96            | 3-Furoic acid                             | C <sub>5</sub> H <sub>4</sub> O <sub>3</sub>                | 111.008768  | 111.0088     | 0.4      | √         |      |       |
| 97            | 4-Carboxypyrazole                         | C <sub>4</sub> H <sub>4</sub> N <sub>2</sub> O <sub>2</sub> | 111.020001  | 111.0201     | 0.5      | √         |      |       |
| 98            | 2,3-Dihydro-1H-pyrrole-2-carboxylic acid  | C <sub>5</sub> H <sub>7</sub> NO <sub>2</sub>               | 112.040402  | 112.0406     | 1.8      | √         |      |       |
| 99            | Fumaric acid                              | C <sub>4</sub> H <sub>4</sub> O <sub>4</sub>                | 115.003682  | 115.0037     | 0.0      | √         |      |       |
| 100           | (3S)-3-Amino-4-oxobutanoic acid           | C <sub>4</sub> H <sub>7</sub> NO <sub>3</sub>               | 116.035317  | 116.0353     | -0.5     | √         |      |       |
| 101           | D-beta-Homoserine                         | C <sub>4</sub> H <sub>9</sub> NO <sub>3</sub>               | 118.050967  | 118.0509     | -0.9     | √         |      |       |
| 102           | Benzoic acid                              | C <sub>7</sub> H <sub>6</sub> O <sub>2</sub>                | 121.029503  | 121.0297     | 1.4      | √         |      |       |
| 103           | Phosphoric acid hydroxymethyl ester       | CH <sub>5</sub> O <sub>5</sub> P                            | 126.980183  | 126.9800     | -1.1     | √         |      |       |
| 104           | (2S)-3,4-Dioxoazetidine-2-carboxylic acid | C <sub>4</sub> H <sub>3</sub> NO <sub>4</sub>               | 127.998931  | 127.9988     | -0.9     | √         |      |       |
| 105           | M-toluic Acid                             | C <sub>8</sub> H <sub>8</sub> O <sub>2</sub>                | 135.045153  | 135.0453     | 1.2      |           |      | √     |

| No. | Metabolites                                           | Molecular formula                                            | Theoretical | Experimental | Accuracy | Intensity |      |       |
|-----|-------------------------------------------------------|--------------------------------------------------------------|-------------|--------------|----------|-----------|------|-------|
|     |                                                       |                                                              | m/z         | m/z          |          | ppm       | Cell | Liver |
| 106 | 4-Hydroxybenzoic acid                                 | C <sub>7</sub> H <sub>6</sub> O <sub>3</sub>                 | 137.024418  | 137.0246     | 1.5      |           | √    |       |
| 107 | Phenylpropionic acid                                  | C <sub>9</sub> H <sub>6</sub> O <sub>2</sub>                 | 145.029503  | 145.0297     | 1.4      |           |      | √     |
| 108 | 4-hydroxyheptanoic acid                               | C <sub>7</sub> H <sub>14</sub> O <sub>3</sub>                | 145.087018  | 145.0873     | 2.0      |           |      | √     |
| 109 | D-Arabinose                                           | C <sub>5</sub> H <sub>10</sub> O <sub>5</sub>                | 149.045547  | 149.0455     | -0.1     |           |      | √     |
| 110 | 2-Aminomuconic acid                                   | C <sub>6</sub> H <sub>7</sub> NO <sub>4</sub>                | 156.030231  | 156.03049    | 1.7      |           | √    |       |
| 111 | 2-(Phosphonomethyl)pentanedioic acid                  | C <sub>6</sub> H <sub>11</sub> O <sub>7</sub> P              | 225.016963  | 225.0168     | -0.5     | √         |      | √     |
| 112 | Chorismate                                            | C <sub>10</sub> H <sub>10</sub> O <sub>6</sub>               | 225.040462  | 225.0402     | -1.1     |           |      | √     |
| 113 | Glyceric acid 1,3-biphosphate                         | C <sub>3</sub> H <sub>8</sub> O <sub>10</sub> P <sub>2</sub> | 264.951993  | 264.9516     | -1.4     | √         | √    |       |
| 114 | C <sub>18</sub> H <sub>32</sub> O <sub>3</sub>        | C <sub>18</sub> H <sub>32</sub> O <sub>3</sub>               | 295.227868  | 295.2279     | 0.0      |           |      | √     |
| 115 | 3,8-Dihydroxy-1-methylanthraquinone-2-carboxylic acid | C <sub>16</sub> H <sub>10</sub> O <sub>6</sub>               | 297.040462  | 297.0405     | 0.1      | √         |      | √     |
| 116 | 5-Oxoctadecanoic acid                                 | C <sub>18</sub> H <sub>34</sub> O <sub>3</sub>               | 297.243518  | 297.2438     | 0.9      |           | √    | √     |
| 117 | 9-hydroxyoctadecanoic acid                            | C <sub>18</sub> H <sub>36</sub> O <sub>3</sub>               | 299.259169  | 299.2590     | -0.4     | √         |      |       |
| 118 | xi-7-Hydroxyhexadecanedioic acid                      | C <sub>16</sub> H <sub>30</sub> O <sub>5</sub>               | 301.202048  | 301.2019     | -0.4     | √         |      |       |
| 119 | Eicosapentaenoic acid                                 | C <sub>20</sub> H <sub>30</sub> O <sub>2</sub>               | 301.217304  | 301.2173     | 0.0      | √         |      |       |
| 120 | Arachidonic acid                                      | C <sub>20</sub> H <sub>32</sub> O <sub>2</sub>               | 303.232954  | 303.2329     | 0.0      | √         |      |       |
| 121 | 5'-Carboxy-gamma-chromanol                            | C <sub>18</sub> H <sub>26</sub> O <sub>4</sub>               | 305.175833  | 305.1758     | -0.3     | √         |      |       |

| No. | Metabolites                             | Molecular formula                                               | Theoretical | Experimental | Accuracy | Intensity |      |       |
|-----|-----------------------------------------|-----------------------------------------------------------------|-------------|--------------|----------|-----------|------|-------|
|     |                                         |                                                                 | m/z         | m/z          |          | ppm       | Cell | Liver |
| 122 | 5,8,11-Eicosatrienoic acid              | C <sub>20</sub> H <sub>34</sub> O <sub>2</sub>                  | 305.248604  | 305.2486     | -0.1     | √         |      |       |
| 123 | Penilloic acid                          | C <sub>15</sub> H <sub>20</sub> N <sub>2</sub> O <sub>3</sub> S | 307.112187  | 307.1121     | -0.3     | √         |      |       |
| 124 | Hydroxy-3-oxooctadecatrienoic acid      | C <sub>18</sub> H <sub>28</sub> O <sub>4</sub>                  | 307.191483  | 307.1914     | -0.3     | √         |      |       |
| 125 | Eicosadienoic acid                      | C <sub>20</sub> H <sub>36</sub> O <sub>2</sub>                  | 307.264254  | 307.2643     | 0.1      | √         |      |       |
| 126 | Indoxyl glucuronide                     | C <sub>14</sub> H <sub>15</sub> NO <sub>7</sub>                 | 308.077575  | 308.0775     | -0.3     | √         |      | √     |
| 127 | 3h-Sialic acid                          | C <sub>11</sub> H <sub>19</sub> NO <sub>9</sub>                 | 308.098705  | 308.0985     | -0.6     | √         |      |       |
| 128 | Octadeca-2,4-dienedioic acid            | C <sub>18</sub> H <sub>30</sub> O <sub>4</sub>                  | 309.207133  | 309.2071     | -0.2     | √         |      |       |
| 129 | Ptericoic acid                          | C <sub>14</sub> H <sub>12</sub> N <sub>6</sub> O <sub>3</sub>   | 311.089812  | 311.0899     | 0.2      | √         |      |       |
| 130 | 18-Hydroperoxyoctadeca-2,4-dienoic acid | C <sub>18</sub> H <sub>32</sub> O <sub>4</sub>                  | 311.222783  | 311.2227     | -0.4     | √         |      |       |
| 131 | 3D,7D,11D-Phytanic acid                 | C <sub>20</sub> H <sub>40</sub> O <sub>2</sub>                  | 311.295554  | 311.2954     | -0.4     | √         |      | √     |
| 132 | Gibberellin A120                        | C <sub>19</sub> H <sub>22</sub> O <sub>4</sub>                  | 313.144533  | 313.1446     | 0.1      | √         |      |       |
| 133 | 9,10-DHOME                              | C <sub>18</sub> H <sub>34</sub> O <sub>4</sub>                  | 313.238433  | 313.2383     | -0.3     | √         |      | √     |
| 134 | 3-hydroxypristanic acid                 | C <sub>19</sub> H <sub>38</sub> O <sub>3</sub>                  | 313.274819  | 313.2747     | -0.4     | √         |      | √     |
| 135 | N-Myristoyl Serine                      | C <sub>17</sub> H <sub>33</sub> NO <sub>4</sub>                 | 314.233682  | 314.2336     | -0.1     | √         |      |       |
| 136 | Beta-Citryl-L-glutamic acid             | C <sub>11</sub> H <sub>15</sub> NO <sub>10</sub>                | 320.062319  | 320.0622     | -0.3     | √         |      |       |
| 137 | Bis(2-ethylhexyl) hydrogen phosphate    | C <sub>16</sub> H <sub>35</sub> O <sub>4</sub> P                | 321.22002   | 321.2200     | 0.0      | √         |      |       |

| No. | Metabolites                                                                 | Molecular formula                                               | Theoretical | Experimental | Accuracy | Intensity |      |       |
|-----|-----------------------------------------------------------------------------|-----------------------------------------------------------------|-------------|--------------|----------|-----------|------|-------|
|     |                                                                             |                                                                 | m/z         | m/z          |          | ppm       | Cell | Liver |
| 138 | Cibacic acid                                                                | C <sub>18</sub> H <sub>28</sub> O <sub>5</sub>                  | 323.186398  | 323.1864     | -0.1     | √         |      |       |
| 139 | Z)-15-Oxo-11-eicosenoic acid                                                | C <sub>20</sub> H <sub>36</sub> O <sub>3</sub>                  | 323.259169  | 323.2591     | -0.1     | √         |      |       |
| 140 | Dihydroxy-1H-indole glucuronide I                                           | C <sub>14</sub> H <sub>15</sub> NO <sub>8</sub>                 | 324.07249   | 324.0724     | -0.2     | √         | √    |       |
| 141 | N-Myristoyl Proline                                                         | C <sub>19</sub> H <sub>35</sub> NO <sub>3</sub>                 | 324.254418  | 324.2544     | 0.0      | √         |      |       |
| 142 | 3-[4-Hydroxy-3-[3-(4-hydroxyphenyl)prop-2-enoyloxy]phenyl]prop-2-enoic acid | C <sub>18</sub> H <sub>14</sub> O <sub>6</sub>                  | 325.071762  | 325.0718     | 0.1      |           |      | √     |
| 143 | 3-hydroxyicos-13-enoic acid                                                 | C <sub>20</sub> H <sub>38</sub> O <sub>3</sub>                  | 325.274819  | 325.2748     | -0.2     | √         |      | √     |
| 144 | Margaroylglycine                                                            | C <sub>19</sub> H <sub>37</sub> NO <sub>3</sub>                 | 326.270068  | 326.2700     | -0.1     | √         |      |       |
| 145 | Rhamnolipinogenin                                                           | C <sub>17</sub> H <sub>12</sub> O <sub>7</sub>                  | 327.051026  | 327.0511     | 0.2      | √         |      |       |
| 146 | Prostaglandin M                                                             | C <sub>16</sub> H <sub>24</sub> O <sub>7</sub>                  | 327.144927  | 327.1450     | 0.1      | √         |      |       |
| 147 | Corchorifatty acid F                                                        | C <sub>18</sub> H <sub>32</sub> O <sub>5</sub>                  | 327.217698  | 327.2176     | -0.3     | √         |      |       |
| 148 | Docosahexaenoic acid                                                        | C <sub>22</sub> H <sub>32</sub> O <sub>2</sub>                  | 327.232954  | 327.2329     | -0.2     | √         |      | √     |
| 149 | Blighinone                                                                  | C <sub>16</sub> H <sub>10</sub> O <sub>8</sub>                  | 329.030291  | 329.0302     | -0.3     | √         |      |       |
| 150 | Penicillin G                                                                | C <sub>16</sub> H <sub>18</sub> N <sub>2</sub> O <sub>4</sub> S | 333.091452  | 333.0915     | 0.1      | √         |      |       |
| 151 | ent-16beta-Methoxy-19-kauranoic acid                                        | C <sub>21</sub> H <sub>34</sub> O <sub>3</sub>                  | 333.243518  | 333.2435     | 0.0      | √         |      |       |
| 152 | Docosatrienoic acid                                                         | C <sub>22</sub> H <sub>38</sub> O <sub>2</sub>                  | 333.279904  | 333.2798     | -0.3     | √         |      |       |
| 153 | Dattelic acid                                                               | C <sub>16</sub> H <sub>16</sub> O <sub>8</sub>                  | 335.077241  | 335.0772     | -0.2     | √         |      |       |

| No. | Metabolites                                                 | Molecular formula                                               | Theoretical | Experimental | Accuracy | Intensity |      |       |
|-----|-------------------------------------------------------------|-----------------------------------------------------------------|-------------|--------------|----------|-----------|------|-------|
|     |                                                             |                                                                 | m/z         | m/z          |          | ppm       | Cell | Liver |
| 154 | Erucic acid                                                 | C <sub>22</sub> H <sub>42</sub> O <sub>2</sub>                  | 337.311204  | 337.3112     | 0.0      | √         | √    |       |
| 155 | 11-Dehydro-2,3-dinor-txb2                                   | C <sub>18</sub> H <sub>28</sub> O <sub>6</sub>                  | 339.181312  | 339.1813     | 0.0      | √         |      |       |
| 156 | 19(20)-EpDPE                                                | C <sub>22</sub> H <sub>32</sub> O <sub>3</sub>                  | 343.227868  | 343.2278     | -0.3     | √         |      |       |
| 157 | Sebacoyl-L-carnitine                                        | C <sub>17</sub> H <sub>31</sub> NO <sub>6</sub>                 | 344.207861  | 344.2078     | -0.3     | √         |      |       |
| 158 | Ginkgoic acid                                               | C <sub>22</sub> H <sub>34</sub> O <sub>3</sub>                  | 345.243518  | 345.2436     | 0.2      | √         |      |       |
| 159 | 3-Dibenzofuran-3-yl-2-(phosphonomethylamino)propanoic acid  | C <sub>16</sub> H <sub>16</sub> NO <sub>6</sub> P               | 348.064247  | 348.0643     | 0.0      | √         |      | √     |
| 160 | S-(Formylmethyl)glutathione                                 | C <sub>12</sub> H <sub>19</sub> N <sub>3</sub> O <sub>7</sub> S | 348.087095  | 348.0871     | -0.1     | √         |      | √     |
| 161 | 3-Feruloyl-1,5-quinolactone                                 | C <sub>17</sub> H <sub>18</sub> O <sub>8</sub>                  | 349.092891  | 349.0929     | 0.1      | √         |      |       |
| 162 | 9S-hydroxy-11,15-dioxo-5Z,13E-prostadienoic acid            | C <sub>20</sub> H <sub>30</sub> O <sub>5</sub>                  | 349.202048  | 349.2020     | 0.0      | √         |      | √     |
| 163 | 3,4-Dimethyl-5-pentyl-2-furanundecanoic                     | C <sub>22</sub> H <sub>38</sub> O <sub>3</sub>                  | 349.274819  | 349.2748     | 0.0      | √         |      | √     |
| 164 | S-(2-Hydroxyethyl)glutathione                               | C <sub>12</sub> H <sub>21</sub> N <sub>3</sub> O <sub>7</sub> S | 350.102745  | 350.1027     | 0.0      | √         |      |       |
| 165 | Penicilloic acid                                            | C <sub>16</sub> H <sub>20</sub> N <sub>2</sub> O <sub>5</sub> S | 351.102016  | 351.1021     | 0.1      | √         |      |       |
| 166 | 2,3-Dimethoxy-5-methyl-6-(9'-carboxynonyl)-1,4-benzoquinone | C <sub>19</sub> H <sub>28</sub> O <sub>6</sub>                  | 351.181312  | 351.1813     | -0.2     | √         |      | √     |
| 167 | 1-dodecanoyl-glycero-3-phosphate                            | C <sub>15</sub> H <sub>31</sub> O <sub>7</sub> P                | 353.173464  | 353.1728     | -1.8     | √         |      | √     |
| 168 | Prostaglandin E1                                            | C <sub>20</sub> H <sub>34</sub> O <sub>5</sub>                  | 353.233348  | 353.2334     | 0.1      | √         |      | √     |



| No. | Metabolites                                                              | Molecular formula                                                 | Theoretical | Experimental | Accuracy | Intensity |       |       |
|-----|--------------------------------------------------------------------------|-------------------------------------------------------------------|-------------|--------------|----------|-----------|-------|-------|
|     |                                                                          |                                                                   | m/z         | m/z          | ppm      | Cell      | Liver | Serum |
| 169 | Succinylidisalicylic acid                                                | C <sub>18</sub> H <sub>14</sub> O <sub>8</sub>                    | 357.061591  | 357.0615     | -0.3     | √         |       |       |
| 170 | Pantetheine 4'-phosphate                                                 | C <sub>11</sub> H <sub>23</sub> N <sub>2</sub> O <sub>7</sub> PS  | 357.089082  | 357.0891     | 0.2      | √         | √     |       |
| 171 | (S)-2-Biphenyl-4-yl-1-(1H-tetrazol-5-yl)ethylaminomethyl phosphonic acid | C <sub>16</sub> H <sub>18</sub> N <sub>5</sub> O <sub>3</sub> P   | 358.10745   | 358.1075     | 0.2      |           | √     |       |
| 172 | 10S,17S-DiHDoHE                                                          | C <sub>22</sub> H <sub>32</sub> O <sub>4</sub>                    | 359.222783  | 359.2227     | -0.1     | √         |       |       |
| 173 | Acifluorfen                                                              | C <sub>14</sub> H <sub>7</sub> ClF <sub>3</sub> NO <sub>5</sub>   | 359.989208  | 359.9892     | -0.1     | √         | √     |       |
| 174 | Levofloxacin                                                             | C <sub>18</sub> H <sub>20</sub> FN <sub>3</sub> O <sub>4</sub>    | 360.136508  | 360.1364     | -0.4     | √         |       |       |
| 175 | Gibberellin A115                                                         | C <sub>20</sub> H <sub>26</sub> O <sub>6</sub>                    | 361.165662  | 361.1657     | 0.0      | √         |       |       |
| 176 | 19,20-DiHDPA                                                             | C <sub>22</sub> H <sub>34</sub> O <sub>4</sub>                    | 361.238433  | 361.2385     | 0.0      | √         |       |       |
| 177 | Clinprost                                                                | C <sub>22</sub> H <sub>36</sub> O <sub>4</sub>                    | 363.254083  | 363.2541     | 0.1      | √         |       |       |
| 178 | 2-S-glutathionyl acetate                                                 | C <sub>12</sub> H <sub>19</sub> N <sub>3</sub> O <sub>8</sub> S   | 364.082009  | 364.0820     | 0.1      | √         | √     |       |
| 179 | Cefaclor                                                                 | C <sub>15</sub> H <sub>14</sub> ClN <sub>3</sub> O <sub>4</sub> S | 366.032078  | 366.0320     | -0.2     | √         |       |       |
| 180 | Zeanoside B                                                              | C <sub>16</sub> H <sub>17</sub> NO <sub>9</sub>                   | 366.083055  | 366.0831     | 0.2      | √         |       |       |
| 181 | 19-hydroxyprostaglandin H2(1-)                                           | C <sub>20</sub> H <sub>32</sub> O <sub>6</sub>                    | 367.212612  | 367.2127     | 0.2      | √         | √     |       |
| 182 | Grifolic acid                                                            | C <sub>23</sub> H <sub>32</sub> O <sub>4</sub>                    | 371.222783  | 371.2228     | -0.1     | √         |       | √     |
| 183 | Menadiol disuccinate                                                     | C <sub>19</sub> H <sub>18</sub> O <sub>8</sub>                    | 373.092891  | 373.0928     | -0.2     | √         |       |       |

| No. | Metabolites                                                                                  | Molecular formula                                                               | Theoretical | Experimental | Accuracy | Intensity |      |       |
|-----|----------------------------------------------------------------------------------------------|---------------------------------------------------------------------------------|-------------|--------------|----------|-----------|------|-------|
|     |                                                                                              |                                                                                 | m/z         | m/z          |          | ppm       | Cell | Liver |
| 184 | Cicaprost                                                                                    | C <sub>22</sub> H <sub>30</sub> O <sub>5</sub>                                  | 373.202048  | 373.2021     | 0.1      | √         | √    | √     |
| 185 | Calcitroic acid                                                                              | C <sub>23</sub> H <sub>34</sub> O <sub>4</sub>                                  | 373.238433  | 373.2384     | 0.0      | √         |      |       |
| 186 | 14-Hydroxy-E4-neuroprostane                                                                  | C <sub>22</sub> H <sub>32</sub> O <sub>5</sub>                                  | 375.217698  | 375.2176     | -0.3     |           | √    |       |
| 187 | S-Pyruvylglutathione                                                                         | C <sub>13</sub> H <sub>19</sub> N <sub>3</sub> O <sub>8</sub> S                 | 376.082009  | 376.08201    | 0.0      |           | √    |       |
| 188 | 5-oxo-pentanoic acid                                                                         | C <sub>14</sub> H <sub>23</sub> N <sub>3</sub> O <sub>7</sub> S                 | 376.118395  | 376.1184     | 0.0      | √         |      |       |
| 189 | (2E)-2-[(4,5-Dimethoxy-2-methyl-3,6-dioxocyclohexa-1,4-dien-1-yl)methylidene]undecanoic acid | C <sub>21</sub> H <sub>30</sub> O <sub>6</sub>                                  | 377.196962  | 377.1970     | 0.2      | √         | √    | √     |
| 190 | Dhv-PGE2                                                                                     | C <sub>22</sub> H <sub>34</sub> O <sub>5</sub>                                  | 377.233348  | 377.2331     | -0.6     | √         |      | √     |
| 191 | 6-Thioguanosine monophosphate                                                                | C <sub>10</sub> H <sub>14</sub> N <sub>5</sub> O <sub>7</sub> PS                | 378.027879  | 378.0276     | -0.8     |           | √    |       |
| 192 | S-Lactoylglutathione                                                                         | C <sub>13</sub> H <sub>21</sub> N <sub>3</sub> O <sub>8</sub> S                 | 378.097659  | 378.0978     | 0.3      | √         | √    |       |
| 193 | Sphingosine 1-phosphate                                                                      | C <sub>18</sub> H <sub>38</sub> NO <sub>5</sub> P                               | 378.241483  | 378.2414     | -0.2     |           |      | √     |
| 194 | Meticillin                                                                                   | C <sub>17</sub> H <sub>20</sub> N <sub>2</sub> O <sub>6</sub> S                 | 379.096931  | 379.0968     | -0.2     | √         |      |       |
| 195 | Norbixin                                                                                     | C <sub>24</sub> H <sub>28</sub> O <sub>4</sub>                                  | 379.191483  | 379.1916     | 0.2      | √         |      |       |
| 196 | 20-CooH Itb4                                                                                 | C <sub>21</sub> H <sub>32</sub> O <sub>6</sub>                                  | 379.212612  | 379.2126     | 0.0      | √         | √    | √     |
| 197 | Glufosfamide                                                                                 | C <sub>10</sub> H <sub>21</sub> Cl <sub>2</sub> N <sub>2</sub> O <sub>7</sub> P | 381.039067  | 381.0385     | -1.4     | √         | √    | √     |
| 198 | 12-Oxo-20-trihydroxy-leukotriene B4                                                          | C <sub>20</sub> H <sub>30</sub> O <sub>7</sub>                                  | 381.191877  | 381.1918     | -0.1     | √         | √    | √     |

| No. | Metabolites                                                         | Molecular formula                                               | Theoretical | Experimental | Accuracy | Intensity |      |       |
|-----|---------------------------------------------------------------------|-----------------------------------------------------------------|-------------|--------------|----------|-----------|------|-------|
|     |                                                                     |                                                                 | m/z         | m/z          |          | ppm       | Cell | Liver |
| 199 | serofendic acid                                                     | C <sub>21</sub> H <sub>34</sub> O <sub>4</sub> S                | 381.210504  | 381.2107     | 0.5      |           |      | √     |
| 200 | N6-Succinyl Adenosine                                               | C <sub>14</sub> H <sub>17</sub> N <sub>5</sub> O <sub>8</sub>   | 382.100436  | 382.1004     | 0.0      | √         | √    | √     |
| 201 | (S)-2,3-Dihydro-3,5-dihydroxy-2-oxo-3-indoleacetic acid 5-glucoside | C <sub>16</sub> H <sub>19</sub> NO <sub>10</sub>                | 384.093619  | 384.0936     | -0.2     | √         | √    | √     |
| 202 | 3-Hydroxydodec-6-enedioylcarnitine                                  | C <sub>19</sub> H <sub>33</sub> NO <sub>7</sub>                 | 386.218426  | 386.2184     | 0.0      | √         |      | √     |
| 203 | Rosmic acid                                                         | C <sub>21</sub> H <sub>26</sub> O <sub>7</sub>                  | 389.160577  | 389.1605     | -0.1     | √         |      | √     |
| 204 | 10-Hydroperoxy-H4-neuroprostane                                     | C <sub>22</sub> H <sub>32</sub> O <sub>6</sub>                  | 391.212612  | 391.2127     | 0.1      | √         | √    | √     |
| 205 | gamma-L-Glutamyl-S-(2-carboxy-1-propyl)cysteinylglycine             | C <sub>14</sub> H <sub>23</sub> N <sub>3</sub> O <sub>8</sub> S | 392.113309  | 392.1135     | 0.4      | √         | √    |       |
| 206 | 1-Hydroxypyrene glucuronide                                         | C <sub>22</sub> H <sub>18</sub> O <sub>7</sub>                  | 393.097976  | 393.0981     | 0.4      | √         |      | √     |
| 207 | (9S,10S)-10-hydroxy-9-(phosphonoxy)octadecanoate                    | C <sub>18</sub> H <sub>37</sub> O <sub>7</sub> P                | 395.220414  | 395.2206     | 0.5      | √         | √    |       |
| 208 | 1-hexadecyl-glycero-3-phosphate                                     | C <sub>19</sub> H <sub>41</sub> O <sub>6</sub> P                | 395.256799  | 395.2568     | -0.1     | √         |      |       |
| 209 | S-adenosyl-4-methylthio-2-oxobutanoate                              | C <sub>15</sub> H <sub>20</sub> N <sub>5</sub> O <sub>6</sub> S | 397.106153  | 397.1062     | 0.1      | √         |      |       |
| 210 | beraprost                                                           | C <sub>24</sub> H <sub>30</sub> O <sub>5</sub>                  | 397.202048  | 397.2021     | 0.1      | √         |      |       |
| 211 | Tris(2-butoxyethyl) phosphate                                       | C <sub>18</sub> H <sub>39</sub> O <sub>7</sub> P                | 397.236064  | 397.2359     | -0.3     | √         | √    |       |
| 212 | 3-(Acetyloxy)-2-hydroxypropyl octadecanoate                         | C <sub>23</sub> H <sub>44</sub> O <sub>5</sub>                  | 399.311598  | 399.3119     | 0.7      | √         |      |       |
| 213 | Shoyuflavone B                                                      | C <sub>19</sub> H <sub>14</sub> O <sub>10</sub>                 | 401.05142   | 401.0512     | -0.5     | √         | √    | √     |

| No. | Metabolites                                                      | Molecular formula                                                                           | Theoretical | Experimental | Accuracy | Intensity |      |       |
|-----|------------------------------------------------------------------|---------------------------------------------------------------------------------------------|-------------|--------------|----------|-----------|------|-------|
|     |                                                                  |                                                                                             | m/z         | m/z          |          | ppm       | Cell | Liver |
| 214 | Dihydroresveratrol 3-glucuronide                                 | C <sub>20</sub> H <sub>22</sub> O <sub>9</sub>                                              | 405.119106  | 405.1194     | 0.8      | √         |      | √     |
| 215 | 6,8-Dihydroxy-1,7-diprenylxanthone-2-carboxylic acid             | C <sub>24</sub> H <sub>24</sub> O <sub>6</sub>                                              | 407.150012  | 407.1503     | 0.6      | √         |      | √     |
| 216 | 1-palmitoyl-dihydroxyacetone-phosphate                           | C <sub>19</sub> H <sub>37</sub> O <sub>7</sub> P                                            | 407.220414  | 407.2208     | 0.9      | √         | √    |       |
| 217 | N-Docosahexaenoyl GABA                                           | C <sub>26</sub> H <sub>39</sub> NO <sub>3</sub>                                             | 412.285718  | 412.2859     | 0.3      |           |      | √     |
| 218 | Cephalosporin C                                                  | C <sub>16</sub> H <sub>21</sub> N <sub>3</sub> O <sub>8</sub> S                             | 414.097659  | 414.0977     | 0.0      |           | √    |       |
| 219 | Armillaric acid                                                  | C <sub>23</sub> H <sub>28</sub> O <sub>7</sub>                                              | 415.176227  | 415.1763     | 0.1      | √         |      | √     |
| 220 | Gaylussacin                                                      | C <sub>21</sub> H <sub>22</sub> O <sub>9</sub>                                              | 417.119106  | 417.1194     | 0.8      | √         | √    |       |
| 221 | Artelinate                                                       | C <sub>23</sub> H <sub>30</sub> O <sub>7</sub>                                              | 417.191877  | 417.1919     | 0.0      | √         |      | √     |
| 222 | 1-Piperidinyloxy, 4-(((dodecyloxy)hydroxyphosphinyl)oxy)         | C <sub>21</sub> H <sub>43</sub> NO <sub>5</sub> P                                           | 419.280609  | 419.2807     | 0.3      |           |      | √     |
| 223 | 6-Ethylchenodeoxycholic acid                                     | C <sub>26</sub> H <sub>44</sub> O <sub>4</sub>                                              | 419.316683  | 419.3167     | 0.1      |           | √    |       |
| 224 | Lovastatin acid                                                  | C <sub>24</sub> H <sub>38</sub> O <sub>6</sub>                                              | 421.259562  | 421.2597     | 0.3      |           | √    | √     |
| 225 | Gemcitabine diphosphate                                          | C <sub>9</sub> H <sub>13</sub> F <sub>2</sub> N <sub>3</sub> O <sub>10</sub> P <sub>2</sub> | 421.997147  | 421.9971     | -0.1     |           |      | √     |
| 226 | S-(1,2-Dicarboxyethyl)glutathione                                | C <sub>14</sub> H <sub>21</sub> N <sub>3</sub> O <sub>10</sub> S                            | 422.087488  | 422.0876     | 0.2      | √         | √    |       |
| 227 | Cysteineglutathione disulfide                                    | C <sub>13</sub> H <sub>22</sub> N <sub>4</sub> O <sub>8</sub> S <sub>2</sub>                | 425.080629  | 425.0807     | 0.1      | √         | √    |       |
| 228 | 4 $\alpha$ -carboxy-5 $\alpha$ -cholesta-8,24-dien-3 $\beta$ -ol | C <sub>28</sub> H <sub>44</sub> O <sub>3</sub>                                              | 427.321769  | 427.3218     | 0.2      | √         | √    | √     |

| No. | Metabolites                                                 | Molecular formula                                             | Theoretical | Experimental | Accuracy | Intensity |      |       |
|-----|-------------------------------------------------------------|---------------------------------------------------------------|-------------|--------------|----------|-----------|------|-------|
|     |                                                             |                                                               | m/z         | m/z          |          | ppm       | Cell | Liver |
| 229 | 4alpha-Carboxy-5alpha-cholesta-8-en-3beta-ol                | C <sub>28</sub> H <sub>46</sub> O <sub>3</sub>                | 429.337419  | 429.3375     | 0.2      | √         | √    | √     |
| 230 | Asperulosidic acid                                          | C <sub>18</sub> H <sub>24</sub> O <sub>12</sub>               | 431.1195    | 431.1191     | -0.9     |           |      | √     |
| 231 | Aleglitazar                                                 | C <sub>24</sub> H <sub>23</sub> NO <sub>5</sub> S             | 436.122417  | 436.1227     | 0.7      | √         | √    |       |
| 232 | Nonacosanoic acid                                           | C <sub>29</sub> H <sub>58</sub> O <sub>2</sub>                | 437.436405  | 437.4366     | 0.5      | √         |      | √     |
| 233 | gamma-CEHC glucuronide                                      | C <sub>21</sub> H <sub>28</sub> O <sub>10</sub>               | 439.160971  | 439.1609     | -0.2     |           |      | √     |
| 234 | Folic acid                                                  | C <sub>19</sub> H <sub>19</sub> N <sub>7</sub> O <sub>6</sub> | 440.132405  | 440.1324     | 0.0      | √         | √    |       |
| 235 | 2,2,3,3,4,4,5,5,6,6,7,7,8,8,9,9-Hexadecafluorononanoic acid | C <sub>9</sub> H <sub>2</sub> F <sub>16</sub> O <sub>2</sub>  | 444.972654  | 444.9723     | -0.8     |           |      | √     |
| 236 | Lucuminic acid                                              | C <sub>19</sub> H <sub>26</sub> O <sub>12</sub>               | 445.13515   | 445.1347     | -1.0     |           |      | √     |
| 237 | Corticosterone-21-hemisuccinate                             | C <sub>25</sub> H <sub>34</sub> O <sub>7</sub>                | 445.223177  | 445.2233     | 0.3      | √         |      |       |
| 238 | 13'-Carboxy-gamma-tocopherol                                | C <sub>28</sub> H <sub>46</sub> O <sub>4</sub>                | 445.332334  | 445.3324     | 0.1      | √         |      | √     |
| 239 | Torvanol A                                                  | C <sub>20</sub> H <sub>20</sub> O <sub>10</sub> S             | 451.070441  | 451.0704     | -0.2     |           |      | √     |
| 240 | Ceanothenic acid                                            | C <sub>29</sub> H <sub>42</sub> O <sub>4</sub>                | 453.301033  | 453.3011     | 0.1      |           |      | √     |
| 241 | (6R)-5,10-Methylenetetrahydrofolate                         | C <sub>20</sub> H <sub>23</sub> N <sub>7</sub> O <sub>6</sub> | 456.163705  | 456.1634     | -0.6     | √         | √    |       |

| No. | Metabolites                                                                       | Molecular formula                                               | Theoretical | Experimental | Accuracy | Intensity |      |       |
|-----|-----------------------------------------------------------------------------------|-----------------------------------------------------------------|-------------|--------------|----------|-----------|------|-------|
|     |                                                                                   |                                                                 | m/z         | m/z          |          | ppm       | Cell | Liver |
| 242 | Methyltetrahydrofolic acid                                                        | C <sub>20</sub> H <sub>25</sub> N <sub>7</sub> O <sub>6</sub>   | 458.179355  | 458.1794     | 0.0      |           | √    |       |
| 243 | Prednisolone hemisuccinate                                                        | C <sub>25</sub> H <sub>32</sub> O <sub>8</sub>                  | 459.202442  | 459.2025     | 0.1      | √         | √    |       |
| 244 | 13'-Carboxy-alpha-tocopherol                                                      | C <sub>29</sub> H <sub>48</sub> O <sub>4</sub>                  | 459.347984  | 459.3480     | 0.1      | √         |      | √     |
| 245 | Dihydroisomorphine-3-glucuronide                                                  | C <sub>23</sub> H <sub>29</sub> NO <sub>9</sub>                 | 462.176955  | 462.1770     | 0.1      |           |      | √     |
| 246 | Biotripyrrin-b                                                                    | C <sub>25</sub> H <sub>27</sub> N <sub>3</sub> O <sub>6</sub>   | 464.182709  | 464.1827     | -0.1     |           | √    |       |
| 247 | Catechin 7-glucuronide                                                            | C <sub>21</sub> H <sub>22</sub> O <sub>12</sub>                 | 465.10385   | 465.1042     | 0.8      |           | √    |       |
| 248 | 3alpha-Androstenediol glucuronide                                                 | C <sub>25</sub> H <sub>40</sub> O <sub>8</sub>                  | 467.265042  | 467.2652     | 0.3      |           |      | √     |
| 249 | Bucladesine                                                                       | C <sub>18</sub> H <sub>24</sub> N <sub>5</sub> O <sub>8</sub> P | 468.128973  | 468.1293     | 0.7      | √         | √    |       |
| 250 | 27-Hydroxyisomangiferolic acid                                                    | C <sub>30</sub> H <sub>48</sub> O <sub>4</sub>                  | 471.347984  | 471.3480     | 0.1      | √         | √    | √     |
| 251 | 2-({4-[(2-amino-8-methyl-4,9-dioxo-6H,7H-pyrazino[1,2-a][1,3,5]triazin-dioic acid | C <sub>20</sub> H <sub>23</sub> N <sub>7</sub> O <sub>7</sub>   | 472.15862   | 472.1587     | 0.2      |           | √    |       |
| 252 | Chicoric acid                                                                     | C <sub>22</sub> H <sub>18</sub> O <sub>12</sub>                 | 473.07255   | 473.0725     | 0.0      |           | √    |       |
| 253 | Enterolactone 3'-glucuronide                                                      | C <sub>24</sub> H <sub>26</sub> O <sub>10</sub>                 | 473.145321  | 473.1452     | -0.3     |           |      | √     |
| 254 | 1-O-all-trans-retinoyl-beta-glucuronic Acid                                       | C <sub>26</sub> H <sub>36</sub> O <sub>8</sub>                  | 475.233742  | 475.2337     | 0.0      |           |      | √     |
| 255 | Enterodiol glucuronide                                                            | C <sub>24</sub> H <sub>30</sub> O <sub>10</sub>                 | 477.176621  | 477.1766     | 0.0      |           |      | √     |
| 256 | Cholylalanine                                                                     | C <sub>27</sub> H <sub>45</sub> NO <sub>6</sub>                 | 478.317412  | 478.3170     | -0.9     | √         |      | √     |
| 257 | Cholesteryl hemisuccinate                                                         | C <sub>31</sub> H <sub>50</sub> O <sub>4</sub>                  | 485.363634  | 485.3636     | 0.0      | √         | √    | √     |

| No. | Metabolites                                                                     | Molecular formula                                                             | Theoretical | Experimental | Accuracy | Intensity |      |       |
|-----|---------------------------------------------------------------------------------|-------------------------------------------------------------------------------|-------------|--------------|----------|-----------|------|-------|
|     |                                                                                 |                                                                               | m/z         | m/z          |          | ppm       | Cell | Liver |
| 258 | Cytidine-5'-diphosphocholine                                                    | C <sub>14</sub> H <sub>26</sub> N <sub>4</sub> O <sub>11</sub> P <sub>2</sub> | 487.100054  | 487.1002     | 0.2      | √         | √    |       |
| 259 | Arjunolic acid                                                                  | C <sub>30</sub> H <sub>48</sub> O <sub>5</sub>                                | 487.342898  | 487.3429     | 0.0      | √         |      | √     |
| 260 | 6-Methoxyluteolin 7-glucuronide                                                 | C <sub>22</sub> H <sub>20</sub> O <sub>13</sub>                               | 491.083114  | 491.0828     | -0.6     |           | √    |       |
| 261 | Pregnanediol 3-O-glucuronide                                                    | C <sub>27</sub> H <sub>44</sub> O <sub>8</sub>                                | 495.296342  | 495.2963     | -0.1     |           |      | √     |
| 262 | N, N'-Bis(gamma-glutamyl)cystine                                                | C <sub>16</sub> H <sub>26</sub> N <sub>4</sub> O <sub>10</sub> S <sub>2</sub> | 497.101759  | 497.1017     | -0.2     |           | √    |       |
| 263 | Medicagenic acid                                                                | C <sub>30</sub> H <sub>46</sub> O <sub>6</sub>                                | 501.322163  | 501.3222     | 0.1      |           |      | √     |
| 264 | 4-O-beta-Laminaribiosyl-D-glucose                                               | C <sub>18</sub> H <sub>32</sub> O <sub>16</sub>                               | 503.161758  | 503.1617     | -0.2     |           | √    |       |
| 265 | Protobassic acid                                                                | C <sub>30</sub> H <sub>48</sub> O <sub>6</sub>                                | 503.337813  | 503.3379     | 0.1      |           |      | √     |
| 266 | Daidzein 4'-glucuronide-7-sulfate                                               | C <sub>21</sub> H <sub>18</sub> O <sub>13</sub> S                             | 509.039535  | 509.0402     | 1.2      |           |      | √     |
| 267 | Pregnanetriol 3a-O-b-D-glucuronide                                              | C <sub>27</sub> H <sub>44</sub> O <sub>9</sub>                                | 511.291257  | 511.2911     | -0.3     |           |      | √     |
| 268 | 1-Stearoylglycerophosphoglycerol                                                | C <sub>24</sub> H <sub>49</sub> O <sub>9</sub> P                              | 511.304143  | 511.3044     | 0.6      | √         | √    |       |
| 269 | Lucidenic acid D2                                                               | C <sub>29</sub> H <sub>38</sub> O <sub>8</sub>                                | 513.249392  | 513.2494     | 0.1      | √         |      | √     |
| 270 | Tsugaric acid C                                                                 | C <sub>32</sub> H <sub>50</sub> O <sub>5</sub>                                | 513.358548  | 513.3586     | 0.0      | √         |      | √     |
| 271 | Fusidic Acid                                                                    | C <sub>31</sub> H <sub>48</sub> O <sub>6</sub>                                | 515.337813  | 515.3376     | -0.4     |           |      | √     |
| 272 | Ganosporeric acid A                                                             | C <sub>30</sub> H <sub>38</sub> O <sub>8</sub>                                | 525.249392  | 525.2493     | -0.1     | √         |      | √     |
| 273 | (24E)-15alpha-Acetoxy-3alpha-hydroxy-23-oxo-7,9(11),24-lanostatrien-26-oic acid | C <sub>32</sub> H <sub>46</sub> O <sub>6</sub>                                | 525.322163  | 525.3222     | 0.0      | √         |      | √     |

| No. | Metabolites                                 | Molecular formula                                                             | Theoretical | Experimental | Accuracy | Intensity |      |       |
|-----|---------------------------------------------|-------------------------------------------------------------------------------|-------------|--------------|----------|-----------|------|-------|
|     |                                             |                                                                               | m/z         | m/z          |          | ppm       | Cell | Liver |
| 274 | 8-oxo-GTP                                   | C <sub>10</sub> H <sub>12</sub> N <sub>5</sub> O <sub>15</sub> P <sub>3</sub> | 533.946998  | 533.9466     | -0.8     | √         |      |       |
| 275 | Formamidopyrimidine nucleoside triphosphate | C <sub>10</sub> H <sub>18</sub> N <sub>5</sub> O <sub>15</sub> P <sub>3</sub> | 539.993948  | 539.9938     | -0.3     | √         | √    |       |
| 276 | Letermovir                                  | C <sub>29</sub> H <sub>28</sub> F <sub>4</sub> N <sub>4</sub> O <sub>4</sub>  | 571.197392  | 571.19746    | 0.1      |           |      | √     |
| 277 | Vitamin D2 3-glucuronide                    | C <sub>34</sub> H <sub>52</sub> O <sub>7</sub>                                | 571.364028  | 571.3641     | 0.1      |           |      | √     |
| 278 | Phosphoribulosylformimino-AICAR-P           | C <sub>15</sub> H <sub>25</sub> N <sub>5</sub> O <sub>15</sub> P <sub>2</sub> | 576.074962  | 576.0748     | -0.3     |           | √    |       |
| 279 | Biliverdin                                  | C <sub>33</sub> H <sub>34</sub> N <sub>4</sub> O <sub>6</sub>                 | 581.240558  | 581.24006    | -0.9     |           | √    |       |
| 280 | Cadazolid                                   | C <sub>29</sub> H <sub>29</sub> F <sub>2</sub> N <sub>3</sub> O <sub>8</sub>  | 584.184995  | 584.18471    | -0.5     | √         |      | √     |
| 281 | 18-Dehydrousolic acid 3-arabinoside         | C <sub>35</sub> H <sub>54</sub> O <sub>7</sub>                                | 585.379678  | 585.37987    | 0.3      | √         |      | √     |
| 282 | 25-Hydroxyvitamin D2-25-glucuronide         | C <sub>34</sub> H <sub>52</sub> O <sub>8</sub>                                | 587.358942  | 587.35882    | -0.2     | √         |      | √     |
| 283 | Oxidized glutathione                        | C <sub>20</sub> H <sub>32</sub> N <sub>6</sub> O <sub>12</sub> S <sub>2</sub> | 611.144686  | 611.14485    | 0.3      | √         | √    | √     |
| 284 | Cholestane-3,7,12,25-tetrol-3-glucuronide   | C <sub>33</sub> H <sub>56</sub> O <sub>10</sub>                               | 611.380072  | 611.38078    | 1.2      |           |      | √     |
| 285 | Perfluorododecanoic acid                    | C <sub>12</sub> HF <sub>23</sub> O <sub>2</sub>                               | 612.953652  | 612.95375    | 0.2      |           |      | √     |
| 286 | APC                                         | C <sub>33</sub> H <sub>38</sub> N <sub>4</sub> O <sub>8</sub>                 | 617.261688  | 617.26164    | -0.1     |           |      | √     |
| 287 | CMP-N-glycolylneuraminate                   | C <sub>20</sub> H <sub>31</sub> N <sub>4</sub> O <sub>17</sub> P              | 629.134906  | 629.13451    | -0.6     |           | √    |       |
| 288 | Dihydrotestosterone diglucuronide           | C <sub>31</sub> H <sub>46</sub> O <sub>14</sub>                               | 641.28148   | 641.28118    | -0.5     |           |      | √     |



| No. | Metabolites                                            | Molecular formula                                                             | Theoretical | Experimental | Accuracy | Intensity |      |       |
|-----|--------------------------------------------------------|-------------------------------------------------------------------------------|-------------|--------------|----------|-----------|------|-------|
|     |                                                        |                                                                               | m/z         | m/z          |          | ppm       | Cell | Liver |
| 289 | Esculentoside E                                        | C <sub>35</sub> H <sub>54</sub> O <sub>11</sub>                               | 649.359336  | 649.35901    | -0.5     |           | √    |       |
| 290 | Cefpimizole                                            | C <sub>28</sub> H <sub>26</sub> N <sub>6</sub> O <sub>10</sub> S <sub>2</sub> | 669.107907  | 669.10721    | -1.0     | √         |      |       |
| 291 | Gomphrenin II                                          | C <sub>33</sub> H <sub>32</sub> N <sub>2</sub> O <sub>15</sub>                | 695.172992  | 695.17257    | -0.6     |           |      | √     |
| 292 | a-L-threo-4-Hex-4-enopyranuronosyl-D-galacturonic acid | C <sub>12</sub> H <sub>16</sub> O <sub>12</sub>                               | 351.0569    | 351.0570     | 0.3      |           | √    |       |
| 293 | GSH                                                    | C <sub>10</sub> H <sub>17</sub> N <sub>3</sub> O <sub>6</sub> S               | 306.07653   | 306.0766     | 0.1      | √         | √    |       |
| 294 | Cholesterol sulfate                                    | C <sub>27</sub> H <sub>46</sub> O <sub>4</sub> S                              | 465.3044    | 465.3045     | 0.2      | √         | √    | √     |
| 295 | Asp-ala                                                | C <sub>7</sub> H <sub>12</sub> N <sub>2</sub> O <sub>5</sub>                  | 203.067365  | 203.0674     | 0.2      |           |      | √     |
| 296 | GSSG                                                   | C <sub>20</sub> H <sub>32</sub> N <sub>6</sub> O <sub>12</sub> S <sub>2</sub> | 611.144685  | 611.1447     | 0.0      | √         | √    | √     |
|     | <b>LPA</b>                                             |                                                                               |             |              |          |           |      |       |
| 297 | LPA(a-13:0)                                            | C <sub>16</sub> H <sub>33</sub> O <sub>7</sub> P                              | 367.189113  | 367.1887     | -1.2     | √         | √    |       |
| 298 | LPA(16:0)                                              | C <sub>19</sub> H <sub>39</sub> O <sub>7</sub> P                              | 409.236064  | 409.2362     | 0.3      | √         | √    | √     |
| 299 | LPA(18:2)                                              | C <sub>21</sub> H <sub>39</sub> O <sub>7</sub> P                              | 433.236064  | 433.2361     | 0.1      |           |      | √     |
| 300 | LPA(18:0)                                              | C <sub>21</sub> H <sub>43</sub> O <sub>7</sub> P                              | 437.267364  | 437.2677     | 0.7      | √         | √    | √     |
| 301 | LPA(20:4)                                              | C <sub>23</sub> H <sub>39</sub> O <sub>7</sub> P                              | 457.236064  | 457.2362     | 0.3      |           |      | √     |
| 302 | LPA(22:6)                                              | C <sub>25</sub> H <sub>39</sub> O <sub>7</sub> P                              | 481.236064  | 481.2361     | 0.1      |           |      | √     |

| No. | Metabolites | Molecular formula                                 | Theoretical | Experimental | Accuracy | Intensity |      |       |
|-----|-------------|---------------------------------------------------|-------------|--------------|----------|-----------|------|-------|
|     |             |                                                   | m/z         | m/z          |          | ppm       | Cell | Liver |
| 303 | LPA(p-16:0) | C <sub>19</sub> H <sub>39</sub> O <sub>6</sub> P  | 393.241149  | 393.2412     | 0.2      | √         |      | √     |
| 304 | LPA(O-18:0) | C <sub>21</sub> H <sub>45</sub> O <sub>6</sub> P  | 423.288099  | 423.2880     | -0.3     | √         |      |       |
|     | <b>LPE</b>  |                                                   |             |              |          |           |      |       |
| 305 | LPE(16:0)   | C <sub>21</sub> H <sub>44</sub> NO <sub>7</sub> P | 452.278263  | 452.2783     | 0.0      |           | √    |       |
| 306 | LPE(18:0)   | C <sub>23</sub> H <sub>48</sub> NO <sub>7</sub> P | 480.309563  | 480.3098     | 0.5      | √         | √    | √     |
| 307 | LPE(18:1)   | C <sub>23</sub> H <sub>46</sub> NO <sub>7</sub> P | 478.293913  | 478.2940     | 0.1      |           | √    | √     |
| 308 | LPE(18:2)   | C <sub>23</sub> H <sub>44</sub> NO <sub>7</sub> P | 476.278263  | 476.2783     | 0.1      |           | √    |       |
| 309 | LPE(20:4)   | C <sub>25</sub> H <sub>44</sub> NO <sub>7</sub> P | 500.278263  | 500.2785     | 0.4      |           | √    | √     |
| 310 | LPE(22:2)   | C <sub>27</sub> H <sub>52</sub> NO <sub>7</sub> P | 532.340863  | 532.3407     | -0.3     | √         |      |       |
| 311 | LPE(p-16:0) | C <sub>21</sub> H <sub>44</sub> NO <sub>6</sub> P | 436.283348  | 436.2838     | 1.1      |           |      | √     |
|     | <b>LPI</b>  |                                                   |             |              |          |           |      |       |
| 312 | LPI(16:0)   | C <sub>25</sub> H <sub>49</sub> O <sub>12</sub> P | 571.288887  | 571.2885     | -0.7     | √         | √    |       |
| 313 | LPI(17:0)   | C <sub>26</sub> H <sub>51</sub> O <sub>12</sub> P | 585.304537  | 585.3042     | -0.6     | √         | √    |       |
| 314 | LPI(18:0)   | C <sub>27</sub> H <sub>53</sub> O <sub>12</sub> P | 599.320187  | 599.3206     | 0.7      |           |      | √     |
| 315 | LPI(18:1)   | C <sub>27</sub> H <sub>51</sub> O <sub>12</sub> P | 597.304537  | 597.3040     | -0.9     |           | √    |       |
| 316 | LPI(18:2)   | C <sub>27</sub> H <sub>49</sub> O <sub>12</sub> P | 595.288887  | 595.2883     | -0.9     |           | √    |       |

| No. | Metabolites | Molecular formula                                  | Theoretical | Experimental | Accuracy | Intensity |       |       |
|-----|-------------|----------------------------------------------------|-------------|--------------|----------|-----------|-------|-------|
|     |             |                                                    | m/z         | m/z          | ppm      | Cell      | Liver | Serum |
| 317 | LPI(18:3)   | C <sub>27</sub> H <sub>45</sub> O <sub>12</sub> P  | 591.257587  | 591.2574     | -0.4     | √         |       |       |
| 318 | LPI(20:3)   | C <sub>29</sub> H <sub>51</sub> O <sub>12</sub> P  | 621.304537  | 621.3044     | -0.2     | √         |       | √     |
| 319 | LPI(20:1)   | C <sub>29</sub> H <sub>55</sub> O <sub>12</sub> P  | 625.335837  | 625.3356     | -0.3     | √         |       |       |
| 320 | LPI(20:0)   | C <sub>29</sub> H <sub>57</sub> O <sub>12</sub> P  | 627.351487  | 627.3516     | 0.1      | √         | √     |       |
| 321 | LPI(22:4)   | C <sub>31</sub> H <sub>53</sub> O <sub>12</sub> P  | 647.320187  | 647.3201     | -0.1     | √         |       |       |
| 322 | LPI(22:5)   | C <sub>31</sub> H <sub>51</sub> O <sub>12</sub> P  | 645.304537  | 645.3046     | 0.1      | √         | √     |       |
| 323 | LPI(22:6)   | C <sub>31</sub> H <sub>49</sub> O <sub>12</sub> P  | 643.288887  | 643.2882     | -1.0     |           | √     |       |
|     | <b>PE</b>   |                                                    |             |              |          |           |       |       |
| 324 | PE(34:2)    | C <sub>39</sub> H <sub>74</sub> NO <sub>8</sub> P  | 714.507928  | 714.5073     | -0.9     |           | √     |       |
| 325 | PE(36:4)    | C <sub>41</sub> H <sub>74</sub> NO <sub>8</sub> P  | 738.507928  | 738.5071     | -1.1     |           | √     |       |
| 326 | PE(36:3)    | C <sub>41</sub> H <sub>76</sub> NO <sub>8</sub> P  | 740.523578  | 740.5235     | -0.1     | √         |       |       |
| 327 | PE(36:2)    | C <sub>41</sub> H <sub>78</sub> NO <sub>8</sub> P  | 742.539229  | 742.5392     | -0.1     |           |       | √     |
| 328 | PE(38:4)    | C <sub>43</sub> H <sub>78</sub> NO <sub>8</sub> P  | 766.539229  | 766.5398     | 0.8      |           |       | √     |
|     | <b>PS</b>   |                                                    |             |              |          |           |       |       |
| 329 | PS(36:4)    | C <sub>42</sub> H <sub>74</sub> NO <sub>10</sub> P | 782.497758  | 782.4977     | 0.0      |           |       | √     |
|     | <b>LPS</b>  |                                                    |             |              |          |           |       |       |

| No.       | Metabolites           | Molecular formula                                 | Theoretical | Experimental | Accuracy | Intensity |      |       |
|-----------|-----------------------|---------------------------------------------------|-------------|--------------|----------|-----------|------|-------|
|           |                       |                                                   | m/z         | m/z          |          | ppm       | Cell | Liver |
| 330       | LPS(16:0/0:0)         | C <sub>22</sub> H <sub>44</sub> NO <sub>9</sub> P | 496.268092  | 496.2683     | 0.3      | √         |      |       |
| 331       | LPS(18:2(9Z,12Z)/0:0) | C <sub>24</sub> H <sub>44</sub> NO <sub>9</sub> P | 520.268092  | 520.2680     | -0.1     | √         | √    |       |
| 332       | LPS(18:1(9Z)/0:0)     | C <sub>24</sub> H <sub>46</sub> NO <sub>9</sub> P | 522.283742  | 522.2839     | 0.2      | √         | √    |       |
| 333       | LPS(18:0/0:0)         | C <sub>24</sub> H <sub>48</sub> NO <sub>9</sub> P | 524.299392  | 524.2994     | 0.0      | √         | √    |       |
| <b>PI</b> |                       |                                                   |             |              |          |           |      |       |
| 334       | PI(32:2)              | C <sub>41</sub> H <sub>77</sub> O <sub>13</sub> P | 807.502903  | 807.5029     | 0.0      |           |      | √     |
| 335       | PI(32:1)              | C <sub>41</sub> H <sub>79</sub> O <sub>13</sub> P | 809.518553  | 809.5181     | -0.6     |           |      | √     |
| 336       | PI(34:3)              | C <sub>43</sub> H <sub>77</sub> O <sub>13</sub> P | 831.502903  | 831.5024     | -0.6     |           |      | √     |
| 337       | PI(34:2)              | C <sub>43</sub> H <sub>79</sub> O <sub>13</sub> P | 833.518553  | 833.5184     | -0.2     |           |      | √     |
| 338       | PI(36:2)              | C <sub>45</sub> H <sub>83</sub> O <sub>13</sub> P | 861.549853  | 861.5495     | -0.4     |           |      | √     |
| 339       | PI(38:5)              | C <sub>47</sub> H <sub>81</sub> O <sub>13</sub> P | 883.534203  | 883.5347     | 0.6      |           |      | √     |
| 340       | PI(38:4)              | C <sub>47</sub> H <sub>83</sub> O <sub>13</sub> P | 885.549853  | 885.5499     | 0.1      |           | √    |       |
| <b>PG</b> |                       |                                                   |             |              |          |           |      |       |
| 341       | PG(34:2)              | C <sub>40</sub> H <sub>75</sub> O <sub>10</sub> P | 745.502509  | 745.5022     | -0.5     |           |      | √     |
| 342       | PG(34:1)              | C <sub>40</sub> H <sub>77</sub> O <sub>10</sub> P | 747.518159  | 747.5188     | 0.9      |           |      | √     |
| 343       | PG(36:1)              | C <sub>42</sub> H <sub>81</sub> O <sub>10</sub> P | 775.549459  | 775.5493     | -0.3     | √         |      |       |

| No.        | Metabolites           | Molecular formula                                 | Theoretical | Experimental | Accuracy | Intensity |       |       |
|------------|-----------------------|---------------------------------------------------|-------------|--------------|----------|-----------|-------|-------|
|            |                       |                                                   | m/z         | m/z          | ppm      | Cell      | Liver | Serum |
| 344        | PG(38:3)              | C <sub>44</sub> H <sub>81</sub> O <sub>10</sub> P | 799.549459  | 799.5496     | 0.1      | √         |       |       |
| 345        | PG(38:1)              | C <sub>44</sub> H <sub>85</sub> O <sub>10</sub> P | 803.580759  | 803.5804     | -0.5     | √         |       |       |
| <b>LPG</b> |                       |                                                   |             |              |          |           |       |       |
| 346        | LPG(16:0/0:0)         | C <sub>22</sub> H <sub>45</sub> O <sub>9</sub> P  | 483.272843  | 483.2729     | 0.0      | √         | √     |       |
| 347        | LPG(18:2(9Z,12Z)/0:0) | C <sub>24</sub> H <sub>45</sub> O <sub>9</sub> P  | 507.272843  | 507.2731     | 0.5      |           | √     |       |
| 348        | LPG(18:1(9Z)/0:0)     | C <sub>24</sub> H <sub>47</sub> O <sub>9</sub> P  | 509.288493  | 509.2886     | 0.1      | √         | √     |       |
| <b>PA</b>  |                       |                                                   |             |              |          |           |       |       |
| 349        | PA(8:0/16:0)          | C <sub>27</sub> H <sub>53</sub> O <sub>8</sub> P  | 535.340529  | 535.3405     | -0.1     | √         |       |       |
| 350        | PA(30:2)              | C <sub>33</sub> H <sub>61</sub> O <sub>8</sub> P  | 615.403129  | 615.4037     | 0.9      |           | √     |       |
| 351        | PA(30:1)              | C <sub>33</sub> H <sub>63</sub> O <sub>8</sub> P  | 617.418779  | 617.4184     | -0.5     | √         | √     |       |
| 352        | PA(30:0)              | C <sub>33</sub> H <sub>65</sub> O <sub>8</sub> P  | 619.434429  | 619.4342     | -0.3     | √         |       |       |
| 353        | PA(32:2)              | C <sub>35</sub> H <sub>65</sub> O <sub>8</sub> P  | 643.434429  | 643.4340     | -0.6     |           | √     |       |
| 354        | PA(34:2)              | C <sub>37</sub> H <sub>69</sub> O <sub>8</sub> P  | 671.465729  | 671.4653     | -0.7     |           | √     |       |
| 355        | PA(36:4)              | C <sub>39</sub> H <sub>69</sub> O <sub>8</sub> P  | 695.465729  | 695.4654     | -0.5     |           | √     |       |
| 356        | PA(36:2)              | C <sub>39</sub> H <sub>73</sub> O <sub>8</sub> P  | 699.497029  | 699.4974     | 0.5      |           | √     | √     |
| <b>FA</b>  |                       |                                                   |             |              |          |           |       |       |

| No.                                     | Metabolites               | Molecular formula                                | Theoretical | Experimental | Accuracy | Intensity  |            |            |
|-----------------------------------------|---------------------------|--------------------------------------------------|-------------|--------------|----------|------------|------------|------------|
|                                         |                           |                                                  | m/z         | m/z          |          | ppm        | Cell       | Liver      |
| 357                                     | FA(16:0(-OH))             | C <sub>16</sub> H <sub>32</sub> O <sub>3</sub>   | 271.227868  | 271.2276     | -0.9     | √          | √          | √          |
| 358                                     | FA(20:2)                  | C <sub>18</sub> H <sub>32</sub> O <sub>2</sub>   | 279.232954  | 279.2329     | -0.3     | √          | √          | √          |
| 359                                     | FA(22:0)                  | C <sub>22</sub> H <sub>44</sub> O <sub>2</sub>   | 339.326854  | 339.3267     | -0.4     | √          | √          |            |
| 360                                     | FA(23:0)                  | C <sub>23</sub> H <sub>46</sub> O <sub>2</sub>   | 353.342504  | 353.3425     | 0.0      | √          | √          | √          |
| <b>FAHFA</b>                            |                           |                                                  |             |              |          |            |            |            |
| 361                                     | FAHFA(16:0/9-O-16:0)      | C <sub>32</sub> H <sub>62</sub> O <sub>4</sub>   | 509.457534  | 509.4576     | 0.2      |            |            | √          |
| 362                                     | FAHFA(16:1(9Z)/9-O-18:0)  | C <sub>34</sub> H <sub>64</sub> O <sub>4</sub>   | 535.473184  | 535.4731     | -0.1     | √          |            |            |
| 363                                     | FAHFA(16:0/9-O-18:0)      | C <sub>34</sub> H <sub>66</sub> O <sub>4</sub>   | 537.488834  | 537.4888     | 0.0      | √          |            |            |
| 364                                     | FAHFA(18:1(9Z)/12-O-18:0) | C <sub>36</sub> H <sub>68</sub> O <sub>4</sub>   | 563.504484  | 563.5045     | 0.0      | √          | √          | √          |
| <b>CPA</b>                              |                           |                                                  |             |              |          |            |            |            |
| 365                                     | CPA(16:0)                 | C <sub>19</sub> H <sub>37</sub> O <sub>6</sub> P | 391.225499  | 391.2255     | 0.1      | √          | √          | √          |
| 366                                     | CPA(18:2(9Z,12Z)/0:0)     | C <sub>21</sub> H <sub>37</sub> O <sub>6</sub> P | 415.225499  | 415.2251     | -1.1     |            | √          |            |
| 367                                     | CPA(18:1(11Z)/0:0)        | C <sub>21</sub> H <sub>39</sub> O <sub>6</sub> P | 417.241149  | 417.2411     | -0.2     | √          |            |            |
| 368                                     | CPA(18:0/0:0)             | C <sub>21</sub> H <sub>41</sub> O <sub>6</sub> P | 419.256799  | 419.2569     | 0.1      | √          |            | √          |
| <b>Total of 368 anionic metabolites</b> |                           |                                                  |             |              |          | <b>252</b> | <b>173</b> | <b>136</b> |

**Table S14.** The list of isotopic internal standards identified by FTICR MS in 3 biological samples based on standards.

| <b>Isotopic internal standards</b> | <b>Molecular formula</b>                                             | <b>Theoretical m/z</b> |
|------------------------------------|----------------------------------------------------------------------|------------------------|
| UTP                                | $^{13}\text{C}_9\text{H}_{15}^{15}\text{N}_2\text{O}_{15}\text{P}_3$ | 493.985478             |
| GTP                                | $^{13}\text{C}_{10}\text{H}_{16}\text{N}_5\text{O}_{14}\text{P}_3$   | 532.016894             |
| dGMP                               | $^{13}\text{C}_{10}\text{H}_{14}^{15}\text{N}_5\text{O}_7\text{P}$   | 361.074488             |
| UMP                                | $\text{C}_9\text{H}_{13}^{15}\text{N}_2\text{O}_9\text{P}$           | 325.022658             |

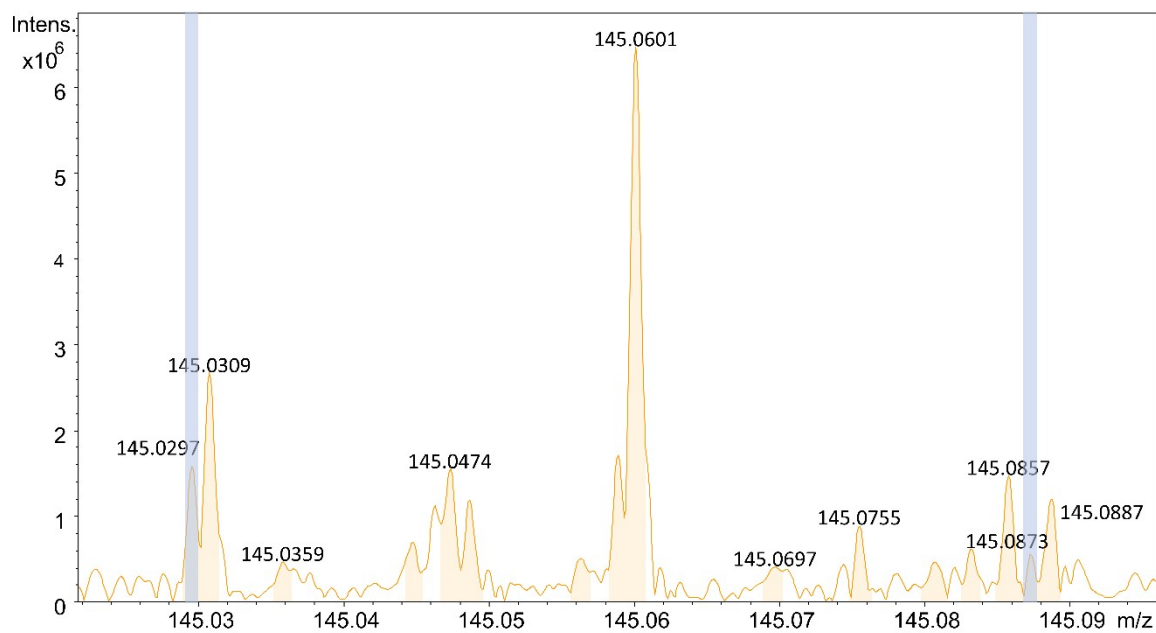

**Fig S16.** The FTICR MS can be differ the isomer with similar mass data such as 145.0297 to 145.0873.



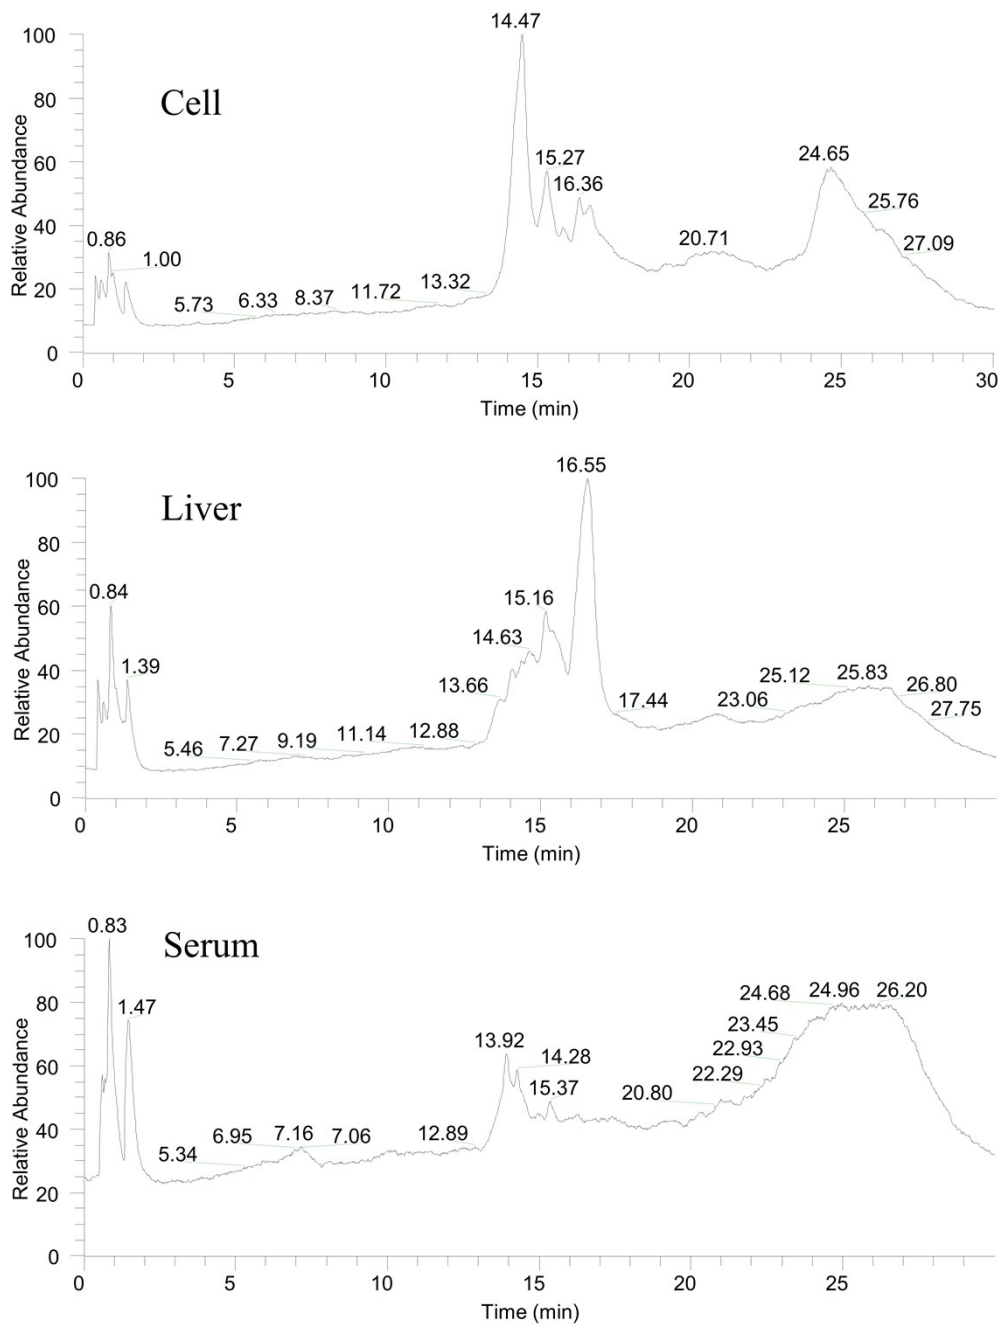

**Fig S17.** The typical HPLC chromatogram of different biological samples.

## References

1. M. Zhang, Z. Lai, R. Zhang, S. Liu, H. Tian, Y. Qiu, D. Li, J. Zhou and Z. Li, *Small*, 2023, **19**, 2204734.
2. A. Meng, J. Xing, Z. Li and Q. Li, *ACS Appl. Mater. Interfaces*, 2015, **7**, 27449-27457.
